# Supplementary material for: Characterizing the Genetic Basis for Nicotine Induced Cancer Development: A Transcriptome Sequencing Study
Source: PLoS One. 2013 Jun 18;8(6):e67252. doi: 10.1371/journal.pone.0067252 (PMC3688980; doi:10.1371/journal.pone.0067252)
Supplement: Table S1 — List of all differentially expressed genes and uncharacterized transcripts (q<0.05). (XLS) [file pone.0067252.s006.xls]

## Sheet: Sheet1
Gene	Locus	Log2(fold_change)	p_value	q_value	Significant
HPCAL4	1:40144319-40157361	4.70503	1.06233e-05	0.000218479	yes
TREM1	6:41241842-41254457	4.6393	0.00453878	0.0357743	yes
-	X:39487474-39490677	4.42875	0.00318633	0.0271184	yes
EFNA2	19:1282818-1378589	3.94324	0.000138223	0.00204785	yes
-	16:88262665-88265845	3.90817	2.64616e-06	6.75258e-05	yes
SPATA22,TRPV3	17:3343307-3461289	3.65279	4.43645e-13	5.09024e-11	yes
KRT85	12:52753789-52761265	3.58428	0.00531016	0.0400715	yes
FTH1P20	2:181737593-181738141	3.51798	3.37703e-08	1.46819e-06	yes
FAM129A	1:184759857-184943746	3.40303	0.00040027	0.00501076	yes
SPRR2D	1:153012200-153014407	3.31005	1.13672e-05	0.000231903	yes
GPR56	16:57644563-57698944	3.30075	2.31402e-05	0.000433187	yes
KRT6B	12:52840434-52845971	3.20327	2.46571e-05	0.000457745	yes
IFI44L	1:79085606-79111768	3.2004	4.32787e-09	2.33259e-07	yes
S100A2	1:153532786-153540366	3.19466	0	0	yes
MME	3:154741912-154901497	3.14591	4.01831e-10	2.68945e-08	yes
WISP2	20:43285091-43379675	3.12008	1.90789e-05	0.000365758	yes
IFI44	1:79115357-79129763	3.10511	1.30247e-05	0.000261867	yes
PROM2	2:95940200-95957056	3.06534	3.7681e-13	4.45745e-11	yes
-	7:151217738-151218277	3.01312	0.00628123	0.0455591	yes
CRCT1	1:152486977-152488486	3.0009	5.33103e-07	1.69482e-05	yes
SLC22A18AS	11:2907911-2946476	2.90057	2.00074e-09	1.14349e-07	yes
MT1E	16:56659386-56661024	2.89182	0	0	yes
PTAFR	1:28473676-28520447	2.81836	1.92757e-05	0.000369068	yes
-	5:107788477-107790682	2.81562	7.12489e-10	4.41975e-08	yes
SLC7A5	16:87863628-87903094	2.7915	0	0	yes
KRT80	12:52562776-52585784	2.76973	0.0011379	0.0118853	yes
CAMP	3:48264836-48266981	2.7529	0.000196323	0.00276374	yes
FAT2	5:150883653-150970764	2.7397	7.83687e-09	3.99969e-07	yes
HDDC2	6:125589026-125623282	2.69901	2.98507e-05	0.000539718	yes
STEAP1	7:89511666-89870091	2.6885	1.45739e-07	5.38494e-06	yes
KRT15	17:39669994-39678781	2.64134	0	0	yes
SPTLC3	20:12989626-13189886	2.63639	0.00574069	0.0424432	yes
CTSH	15:79213399-79241916	2.62689	2.22045e-16	4.2355e-14	yes
LCE1B	1:152783719-152785585	2.59736	0.00255544	0.0228314	yes
HOXB9	17:46684589-46724385	2.58737	0.00301359	0.0259084	yes
CGREF1	2:27309614-27341995	2.58488	0.00471851	0.0368498	yes
-	6:359362-360343	2.58327	0.00368699	0.0302981	yes
SRPX2	X:99899182-99926425	2.57772	0	0	yes
-	3:97910175-97910638	2.56662	1.97487e-07	7.0085e-06	yes
KLK5	19:51446559-51456344	2.53698	0.000429464	0.00532815	yes
SH2D2A	1:156776004-156851642	2.50571	2.13257e-06	5.61086e-05	yes
-	12:132101451-132102489	2.49987	0.00698214	0.0495339	yes
EVPLL	17:18278850-18292961	2.49273	0.000300165	0.00393854	yes
KRT81,KRT83	12:52626303-52715182	2.48538	0	0	yes
UPP1	7:48127523-48148330	2.44871	0	0	yes
ENTPD3	3:40355292-40494820	2.41758	0.0014614	0.0145473	yes
-	3:144240244-144244530	2.39078	0.000223813	0.00306864	yes
MMP2	16:55512741-55540603	2.36704	7.36778e-10	4.51536e-08	yes
ANGPT4	20:853295-896977	2.36398	1.09194e-06	3.10298e-05	yes
-	14:101759096-101759948	2.36338	0.000776116	0.00862602	yes
CCDC159	19:11457180-11465681	2.36296	0.00495169	0.0380718	yes
PAX8	2:113969056-114036527	2.36235	0.000282957	0.00375146	yes
GRAMD1B	11:123325086-123498482	2.32582	3.67021e-10	2.48922e-08	yes
DDIT4	10:74033677-74035794	2.30454	0	0	yes
KIF21B	1:200938519-200992828	2.28852	1.02297e-06	2.94537e-05	yes
FAH	15:80444831-80479288	2.28739	0.00559511	0.0415434	yes
LGALS1	22:38071614-38075813	2.27961	0	0	yes
STAC	3:36421835-36589499	2.26717	0.000853448	0.00935604	yes
-	6:355134-359300	2.26555	5.78966e-09	3.0571e-07	yes
SLCO2A1	3:133651539-133771028	2.26515	0.000376273	0.00477697	yes
SLC37A2	11:124932962-124960747	2.25792	0	0	yes
PROX1	1:213992977-214214853	2.24945	0	0	yes
-	X:64992641-65060602	2.24798	0.00117244	0.0121711	yes
MED24	17:38175349-38210679	2.22971	0	0	yes
VCAN	5:82767283-82878122	2.22812	0.000847542	0.00929798	yes
CCDC167	6:37450695-37467700	2.22299	5.02761e-07	1.61519e-05	yes
C3AR1	12:7917811-8250367	2.21408	0.00042596	0.00528897	yes
MLPH	2:238394070-238463961	2.20251	1.80312e-06	4.81043e-05	yes
FLRT2	14:85996487-86095034	2.19932	0.00333452	0.0280203	yes
EMP1	12:13349649-13369708	2.19846	2.4226e-11	2.12464e-09	yes
CASP14	19:15160187-15169088	2.19825	3.12279e-06	7.72348e-05	yes
UBE2C	20:44441214-44445596	2.19307	0.00347108	0.029024	yes
GPNMB	7:23275585-23314730	2.1831	1.45883e-13	1.88339e-11	yes
-	4:123715490-123747712	2.18	5.60009e-05	0.000929896	yes
NTSR1	20:61340105-61394123	2.17674	1.61025e-07	5.8722e-06	yes
TRNP1	1:27320179-27328107	2.17285	0	0	yes
IFI27	14:94571181-94583033	2.17273	1.11022e-14	1.61352e-12	yes
C6orf105	6:11711725-11807279	2.17177	5.44914e-05	0.000905816	yes
OAS1	12:113344470-113455556	2.17	1.6564e-06	4.48167e-05	yes
CYP4F3	19:15751693-15773634	2.16093	0.000350184	0.00452099	yes
TINAGL1	1:32042115-32053288	2.15626	0	0	yes
PHGDH	1:120202420-120286838	2.15026	1.28322e-11	1.17257e-09	yes
-	7:106478514-106478920	2.14977	0.000817993	0.00901921	yes
SYNPO	5:149980641-150038782	2.14875	9.25291e-06	0.000193424	yes
UNC5B	10:72972326-73062621	2.14628	0	0	yes
IGFBP2	2:217497550-217529159	2.14263	1.27022e-07	4.80982e-06	yes
WNT7B	22:46316241-46373009	2.14133	0	0	yes
-	6:21869148-21869433	2.13952	0.00349615	0.0291816	yes
IGSF3	1:117117030-117210375	2.13184	1.07578e-07	4.10409e-06	yes
GSDMA	17:38119225-38134708	2.13153	0.00035352	0.0045525	yes
CGA	6:87790559-87804955	2.11715	2.02727e-13	2.45525e-11	yes
RAET1E	6:150204142-150262882	2.10469	1.40961e-05	0.000281184	yes
BTBD11	12:107712189-108053421	2.09457	1.87781e-11	1.67575e-09	yes
-	4:127066284-127069675	2.09119	7.27713e-10	4.47778e-08	yes
HEY1	8:80676244-80783994	2.09004	0.000103639	0.00159912	yes
ARC	8:143692409-143695833	2.08528	1.58327e-11	1.43813e-09	yes
SH3KBP1	X:19552082-19905719	2.05937	0.000436819	0.00540622	yes
S100A14	1:153586730-153589970	2.05822	0	0	yes
FAM83F	22:40390952-40440534	2.05342	8.51985e-13	9.55977e-11	yes
PLAU	10:75668934-75682535	2.04045	0	0	yes
-	4:123715490-123747712	2.0357	8.36958e-05	0.00132765	yes
DHRS3	1:12627938-12677737	2.02328	0	0	yes
SCD	10:102095319-102124640	2.02325	0	0	yes
CLMP	11:122940396-123098985	2.02281	2.7828e-07	9.52141e-06	yes
RAC2	22:37621297-37640488	2.01758	0	0	yes
GM2A	5:150560422-150652294	2.01555	8.88178e-16	1.59454e-13	yes
GPR50	X:150343663-150351320	2.01405	3.11544e-07	1.05883e-05	yes
ADAM19	5:156687131-157002783	1.99985	0.00384497	0.0313934	yes
BCYRN1	2:47419543-47572213	1.99813	1.11022e-15	1.94736e-13	yes
SREBF1	17:17584786-17741989	1.98595	1.84757e-11	1.65846e-09	yes
-	12:86135793-86136788	1.9705	0.00165795	0.0160841	yes
RAMP1	2:238767535-238820756	1.96511	2.30889e-06	5.99212e-05	yes
ALDH1L2	12:105380087-105478355	1.9642	0	0	yes
HSPB8	12:119616446-119658936	1.9579	0	0	yes
ADSSL1	14:105190522-105213662	1.94833	0.0052411	0.0397626	yes
TP63	3:189349204-189615068	1.94405	0.00377525	0.0309234	yes
NRP1	10:33466419-33625190	1.94322	2.35244e-07	8.23504e-06	yes
SDC1	2:20400557-20425194	1.94194	0	0	yes
CSTA	3:122044090-122060819	1.93893	0	0	yes
SLC7A11	4:138948575-139163550	1.93131	1.48451e-05	0.000293062	yes
-	3:97911860-97915662	1.92309	0.000442183	0.00545049	yes
-	19:50132467-50133720	1.92087	0.00679436	0.0485035	yes
-	17:81058828-81063867	1.91995	2.8253e-12	3.01497e-10	yes
IL1A	2:113531491-113542167	1.90984	0	0	yes
TRIB3	20:361221-378973	1.90022	0	0	yes
-	3:46457971-46465328	1.89722	0	0	yes
-	5:158979920-159010674	1.89474	0.000193114	0.00272358	yes
-	9:112952327-113001483	1.89273	0.00430539	0.0343621	yes
PPAP2C	19:281047-291435	1.85645	0	0	yes
ABCD1	X:152990322-153051187	1.85471	1.44062e-07	5.3359e-06	yes
ATP10D	4:47487304-47595503	1.84963	0.000156743	0.0022672	yes
-	4:13990296-14005358	1.84263	9.01486e-06	0.000189747	yes
TACSTD2	1:59040948-59044519	1.84091	0	0	yes
PODXL2	3:127348023-127391652	1.83546	1.56853e-06	4.29463e-05	yes
-	6:3898409-3901927	1.83263	9.61584e-06	0.000199915	yes
TMEM171	5:72415031-72446419	1.83139	0	0	yes
DMBT1	10:124320161-124403254	1.82244	0	0	yes
MYO16	13:109248499-109868748	1.81875	1.45742e-10	1.09558e-08	yes
C11orf86	11:66742593-66744475	1.81662	0.00420992	0.0337413	yes
QRFPR	4:122248448-122302214	1.80771	4.22152e-05	0.000732049	yes
EIF1AP1.1	1:17007486-17046652	1.80192	6.42579e-07	1.98891e-05	yes
VGF	7:100805789-100808874	1.79973	4.34543e-05	0.000747591	yes
CACNA2D3	3:54156573-55108586	1.79934	5.01509e-08	2.07963e-06	yes
INSC	11:15133969-15291126	1.78303	0.00294951	0.0255011	yes
SRMS	20:62169710-62178857	1.77361	3.2136e-06	7.93521e-05	yes
ADM2	22:50919984-50924869	1.76984	0	0	yes
DTX3	12:57998404-58003587	1.76545	0.00281881	0.024538	yes
NQO1	16:69740898-69760854	1.76264	0	0	yes
-	6:10348158-10349024	1.75905	0.00504724	0.0386846	yes
KIAA1217	10:23983674-24836772	1.75551	1.79053e-06	4.7936e-05	yes
RBCK1	20:388141-412834	1.74316	2.22045e-16	4.2355e-14	yes
NT5E	6:86159301-86205500	1.73815	3.11277e-06	7.71118e-05	yes
BAI2	1:32192717-32230494	1.73626	0.00324787	0.0275807	yes
ZNRF3	22:29279579-29453475	1.73053	1.20404e-06	3.38374e-05	yes
MT2A	16:56641619-56643412	1.71967	0	0	yes
CD82	11:44585976-44648658	1.70964	0	0	yes
-	14:101771784-101775902	1.70961	5.68956e-06	0.00012712	yes
ARPC5	1:183584071-183604892	1.70674	4.44089e-16	8.36642e-14	yes
APOL6	22:36044408-36064436	1.70262	9.30028e-09	4.63798e-07	yes
-	5:75656357-75656982	1.69265	0	0	yes
MYC	8:128747679-128753674	1.67705	7.55267e-11	5.9717e-09	yes
LMF1	16:903633-1031596	1.67569	0.00539623	0.040508	yes
GLRX	5:95036952-95160087	1.67371	2.66187e-12	2.86057e-10	yes
AGXT2,PRLR	5:34998205-35230928	1.67084	0.000321005	0.00417251	yes
CSF3	17:38171613-38174067	1.66876	3.33022e-12	3.50477e-10	yes
DUSP4	8:29190477-29208222	1.66766	0	0	yes
RGS3	9:116207010-116360018	1.66715	6.64377e-11	5.30806e-09	yes
AOX1	2:201450590-201541787	1.666	6.31732e-05	0.00103334	yes
TLR3	4:186990305-187007882	1.66179	8.06226e-06	0.000172975	yes
IFI6	1:27992571-27998729	1.65917	0	0	yes
PLAUR	19:44150270-44174502	1.65695	3.61188e-08	1.54824e-06	yes
RASSF6	4:74437266-74486348	1.65352	0.000131878	0.00196338	yes
IL1B	2:113587327-113594480	1.65334	8.15025e-06	0.000173705	yes
ITGA10	1:145524312-145543920	1.65248	4.70942e-08	1.97433e-06	yes
ISG15	1:948802-949920	1.64791	4.17444e-14	5.63734e-12	yes
SH3RF3	2:109745803-110262370	1.64681	9.64073e-07	2.81296e-05	yes
-	9:112952327-113001483	1.64578	2.50128e-05	0.000463786	yes
-	15:40690352-40692054	1.63753	0.000364933	0.00466405	yes
ST3GAL4	11:126225534-126875953	1.6369	1.41734e-07	5.27529e-06	yes
FTH1P2	1:228744884-228882416	1.63254	1.88088e-08	8.91372e-07	yes
ABCA1	9:107543282-107691173	1.62929	0.000193668	0.00272888	yes
SDC4	20:43953925-43977064	1.62565	0	0	yes
BRD1	22:50166924-50221199	1.62208	0.00105249	0.011138	yes
-	12:30563946-30570491	1.61695	0.000596351	0.00693621	yes
ALOXE3	17:7999216-8022234	1.61478	0	0	yes
MID1IP1	X:38660684-38665790	1.61227	0	0	yes
GPRC5C	17:72427051-72447069	1.6084	0	0	yes
KCND1	X:48818452-48829308	1.60265	0.00179685	0.017202	yes
KRT5	12:52908356-52914471	1.59799	2.88658e-15	4.73647e-13	yes
MT1L	16:56651387-56652730	1.59671	0.000143257	0.00210404	yes
FUT3	19:5842863-5851517	1.59323	3.55271e-14	4.88418e-12	yes
ANKRD2	10:99331702-99343641	1.59159	1.59934e-07	5.85276e-06	yes
-	10:82285352-82287191	1.59147	0.000379219	0.00479841	yes
RSAD2	2:6980700-7038370	1.58855	3.88835e-05	0.000679031	yes
FRAS1	4:78978723-79465423	1.58575	2.54582e-05	0.0004709	yes
IL6R	1:154374803-154441999	1.5776	2.1914e-06	5.72616e-05	yes
-	14:101777034-101777289	1.57598	0.000179423	0.00255887	yes
CCDC88B	11:64107689-64125006	1.57543	1.25167e-05	0.000253323	yes
SLC22A18	11:2907911-2946476	1.57517	0.00421822	0.03379	yes
GALNT6	12:51745667-51902980	1.57447	5.11702e-12	5.11561e-10	yes
SLAMF7	1:160709036-160724863	1.56703	3.43545e-08	1.48093e-06	yes
CLCA2	1:86889179-86922241	1.56131	2.22045e-16	4.2355e-14	yes
ARHGAP27	17:43471274-43511787	1.55999	1.76038e-08	8.39481e-07	yes
-	7:80893484-80896884	1.55518	6.88167e-09	3.54778e-07	yes
-	1:183582063-183583953	1.55282	0	0	yes
SDCBP2	20:1290617-1373806	1.55242	0	0	yes
C16orf74	16:85729637-85784689	1.54842	0.0044824	0.0354595	yes
-	14:101760522-101769246	1.54813	0	0	yes
ASNS	7:97481422-97557484	1.54585	8.38762e-09	4.19656e-07	yes
RBPMS	8:30239634-30429778	1.54512	0.00193475	0.0181394	yes
GPX8	5:54408798-54469005	1.54419	5.29774e-10	3.39679e-08	yes
LINC00116	2:110969105-111043433	1.54123	3.40974e-08	1.47423e-06	yes
IL18	11:111797867-112095422	1.54031	0.00291792	0.025314	yes
NGFR	17:47572654-47661153	1.53856	0.00235394	0.0213435	yes
ZBED2	3:111011565-111384597	1.53361	3.88986e-06	9.24599e-05	yes
ANXA3	4:79472672-79531597	1.53297	0	0	yes
PAQR5	15:69591261-69740764	1.53257	8.12438e-06	0.000173504	yes
PITPNM3	17:6354582-6459877	1.53085	3.35287e-14	4.65135e-12	yes
ACOT7	1:6324332-6454451	1.52992	1.60316e-13	2.02184e-11	yes
HMOX1	22:35776353-35790207	1.52974	0.00046462	0.00564498	yes
-	10:82283313-82285164	1.52783	0.000441162	0.0054423	yes
MGST2	4:140586921-141075338	1.52775	3.74768e-06	8.93586e-05	yes
TRIB1	8:126442562-126450647	1.52733	1.22125e-14	1.75813e-12	yes
DGAT2	11:75469499-75514460	1.52695	0.00112762	0.0118102	yes
KIF3C	2:26149470-26205618	1.52282	0.000690808	0.00783772	yes
STC2	5:172741709-172756506	1.50635	4.43095e-10	2.92711e-08	yes
TBC1D16	17:77906155-78009661	1.49865	5.15351e-10	3.31825e-08	yes
C6orf108	6:43193366-43197222	1.49494	5.7613e-06	0.000128347	yes
BLMH	17:28575222-28619074	1.49345	0.000498508	0.00597583	yes
PTPRF	1:43990857-44089343	1.49239	2.00184e-10	1.41531e-08	yes
C6orf1	6:34204576-34217247	1.49163	8.42864e-05	0.00133441	yes
CLGN	4:141309608-141349122	1.49068	1.49312e-05	0.00029438	yes
FAM171A2	17:42430584-42441243	1.48888	0.00462943	0.0362841	yes
GPC1	2:241375087-241407513	1.48065	0	0	yes
LY6E	8:144063154-144105249	1.47919	0	0	yes
CCDC80	3:112323406-112368377	1.47899	0.000607334	0.00704785	yes
BCAS4	20:49411430-49493714	1.47852	0.00448777	0.0354652	yes
DUSP6	12:89741049-89792310	1.47815	3.70952e-06	8.85872e-05	yes
PCBD1	10:72642036-72648541	1.47747	1.99388e-10	1.41531e-08	yes
B4GALT1	9:33104079-33179981	1.47689	0	0	yes
ITGB2	21:46305867-46352398	1.47684	3.94779e-09	2.14389e-07	yes
SOX9	17:70067182-70216859	1.47509	0	0	yes
CAMK2B	7:44256508-44374176	1.47364	0.00556587	0.0413914	yes
FASN	17:80036100-80056263	1.47291	0	0	yes
CEACAM1	19:42905665-43032661	1.47129	7.66488e-07	2.32537e-05	yes
TMEM61	1:55446464-55457966	1.46972	9.46199e-06	0.000196985	yes
-	13:43444193-43444440	1.46919	1.55431e-15	2.63542e-13	yes
ISM1	20:13202417-13619587	1.45549	0.000676635	0.00772285	yes
-	11:1794930-1796105	1.45445	9.02389e-07	2.67468e-05	yes
RGS12	4:3294754-3441640	1.45315	0.000562294	0.00661064	yes
PNMAL1	19:46969749-46974820	1.45278	0.00255181	0.0228123	yes
TFCP2L1	2:121974162-122042783	1.45242	0.00114199	0.0119198	yes
ISG20	15:89179383-89199714	1.45217	0.00142662	0.0142382	yes
EDA	X:68835910-69259319	1.45166	0.000160475	0.00231242	yes
SNRPA	19:41197428-41271296	1.44952	0.00164673	0.0160058	yes
-	19:1261134-1265899	1.44908	1.60105e-05	0.000313634	yes
BCL9L	11:118754474-118829269	1.44893	6.12432e-05	0.00100926	yes
TGFBI	5:135364583-135399550	1.44703	0	0	yes
APOBEC3C,APOBEC3D	22:39410087-39429256	1.44627	3.09802e-06	7.68712e-05	yes
FAM43A	3:194406621-194409762	1.44609	3.70836e-10	2.50397e-08	yes
LAT2	7:73613957-73644164	1.43722	1.47438e-13	1.88339e-11	yes
NFIX	19:13106583-13209610	1.43681	7.26716e-10	4.47778e-08	yes
USP54	10:75196185-75385840	1.4325	0.00556492	0.0413914	yes
UNC13B	9:35161987-35405335	1.42973	6.56775e-10	4.12444e-08	yes
COL4A1	13:110801310-111165374	1.4288	0.00230165	0.020969	yes
ACSL1	4:185664159-185747972	1.42639	1.68481e-06	4.54713e-05	yes
HMGB3	X:150148981-150159248	1.42374	1.03381e-05	0.000213766	yes
CXCR5	11:118754474-118829269	1.42125	0.00350015	0.029187	yes
FRRS1	1:100174207-100232187	1.42113	1.86382e-07	6.69221e-06	yes
PPP2R3A	3:135684514-135866977	1.41691	0.000121873	0.00183955	yes
-	6:123426889-123434071	1.40932	0.000515735	0.00615437	yes
FAM131C	1:16384262-16401249	1.40881	1.89714e-05	0.000364156	yes
PRSS8	16:31127074-31147083	1.40724	4.34112e-09	2.33259e-07	yes
RAB27B	18:52495662-52562747	1.40478	7.08282e-11	5.62937e-09	yes
EPHX4	1:92495538-92529093	1.40473	5.17284e-07	1.65141e-05	yes
COMMD7	20:31290492-31331814	1.40412	3.19133e-09	1.76448e-07	yes
PRDX4	X:23682378-23704516	1.40246	0	0	yes
PHKA1	X:71798632-71934388	1.40238	2.22045e-16	4.2355e-14	yes
FAM115B	7:143295132-143305111	1.40232	0.00151923	0.0149777	yes
MKNK2	19:2037477-2051243	1.40141	2.22045e-16	4.2355e-14	yes
TKT	3:53258722-53290068	1.40072	0	0	yes
PANX2	22:50608978-50618723	1.39907	8.0509e-10	4.91427e-08	yes
GPRIN1	5:175953697-176037134	1.39844	0.000769903	0.00856945	yes
CCDC85B	11:65656010-65668504	1.39794	7.34359e-05	0.00118963	yes
SLC16A4	1:110828996-110933704	1.39623	0.00391297	0.0317617	yes
SLC20A1	2:113403433-113421404	1.39505	5.55112e-15	8.64388e-13	yes
ABCD1	X:152990322-153051187	1.39444	0.00186129	0.0176858	yes
COTL1	16:84599198-84651683	1.39376	1.22706e-11	1.13485e-09	yes
AL358813.2	1:149672996-149677287	1.39332	0.000621568	0.00718027	yes
FTH1P8	X:147133752-147134266	1.39127	1.75346e-05	0.000339567	yes
C1orf51	1:150254346-150259505	1.38952	0.000159335	0.00230033	yes
TSPAN5	4:99391517-99579780	1.38891	0.00254398	0.0227689	yes
CCND1	11:69455854-69490184	1.38765	0.000570859	0.00668557	yes
SH3BP4	2:235860616-235964358	1.38752	1.67422e-13	2.09414e-11	yes
PLEKHA4	19:49340351-49371884	1.3853	0.00285053	0.0247858	yes
IGFBP7	4:57829535-58071676	1.38277	8.15964e-05	0.0013052	yes
FAM70B	13:114462176-114567046	1.38241	0.00327082	0.0276929	yes
FTH1P11	8:82351670-82445510	1.38226	2.39948e-05	0.000447547	yes
NPTXR	22:39214456-39239987	1.38122	7.81667e-06	0.00016824	yes
TTC9	14:71108503-71142077	1.38041	0.000520067	0.00619533	yes
MICAL2	11:12115542-12285334	1.37998	0.000787294	0.00874389	yes
PRX	19:40899671-40919273	1.37838	6.39124e-07	1.98636e-05	yes
SPINK1	5:147183574-147216579	1.36396	2.01394e-13	2.45525e-11	yes
CDCA7L	7:21582832-21985702	1.36302	1.28775e-05	0.000259248	yes
-	17:45000485-45177638	1.36278	9.37469e-05	0.00146164	yes
CHCHD10	22:24105207-24126503	1.36078	9.4052e-06	0.000196338	yes
GAS2L2	17:34071529-34081327	1.35535	0.000418963	0.00520633	yes
NHP2	5:177557985-177580968	1.35324	4.25925e-06	9.96873e-05	yes
WNT9A	1:228106356-228135631	1.34452	5.55752e-10	3.53366e-08	yes
CORO6	17:27916800-27950053	1.34186	5.23279e-08	2.15235e-06	yes
VANGL1	1:116184573-116240845	1.34175	8.86324e-08	3.43645e-06	yes
ARAP3	5:140894581-141061812	1.34019	0.00350827	0.0292228	yes
SDPR	2:192699027-193060435	1.33827	0.0002196	0.00302173	yes
RTTN	18:67671044-67872962	1.33671	3.67046e-11	3.09576e-09	yes
IL31RA	5:55147206-55218678	1.33624	1.12252e-06	3.18395e-05	yes
BST2	19:17502081-17516457	1.33605	5.40745e-12	5.32372e-10	yes
BIRC5	17:76210276-76221715	1.33513	0.00527946	0.039923	yes
ETV4	17:41605211-41623762	1.3338	3.79759e-09	2.06969e-07	yes
-	20:12325504-12326322	1.33113	0.00655368	0.0471519	yes
FAM155B	X:68725083-68752351	1.32991	3.9807e-08	1.6968e-06	yes
-	9:110802997-110832760	1.32868	0.00105501	0.0111569	yes
NPM3	10:103541081-103543170	1.32765	0.000291584	0.00383914	yes
TNNT1	19:55644161-55660606	1.32714	6.24432e-09	3.2633e-07	yes
P2RX7	12:121570621-121625835	1.3257	0.000613752	0.00710611	yes
OAS3	12:113344470-113455556	1.32288	8.95079e-06	0.000188659	yes
SYT15	10:46897640-46972872	1.32222	0.005288	0.0399649	yes
COL6A1	21:47401650-47424964	1.32219	0.000655674	0.00750606	yes
LYPD5	19:44298973-44353712	1.322	0.00294608	0.0255011	yes
CDH4	20:59827558-60512307	1.32111	0.000397891	0.00498917	yes
MIDN	19:1248551-1259142	1.31932	5.53699e-11	4.56727e-09	yes
-	3:30745948-30749007	1.31892	0.00388758	0.0316735	yes
PPT1	1:40538378-40563375	1.31838	2.36816e-06	6.11474e-05	yes
-	16:3041112-3052335	1.31808	0.000288694	0.00380574	yes
CLDN9	16:3062456-3064506	1.31125	4.31775e-05	0.000743667	yes
PAQR4	16:3014159-3030536	1.30978	5.88332e-10	3.72529e-08	yes
LRP5	11:68080076-68216743	1.30955	0.00414143	0.0332797	yes
SFN	1:27189632-27191009	1.30923	0	0	yes
F12	5:176829140-176883448	1.3043	0.000107724	0.00165713	yes
DLG3	X:69664710-69725337	1.30211	4.70247e-05	0.000800237	yes
POP7	7:100303675-100305118	1.30125	3.27189e-11	2.83688e-09	yes
PPM1J,RHOC	1:113243727-113258099	1.30088	2.76668e-13	3.2984e-11	yes
DYRK2	12:68042117-68072676	1.29955	0.00606207	0.0443467	yes
MR1	1:181002457-181031145	1.29926	3.90805e-07	1.29364e-05	yes
RAB3D	19:11406823-11450344	1.2987	1.33683e-09	7.87646e-08	yes
LIPG	18:47088426-47119288	1.29823	1.87948e-09	1.0823e-07	yes
IQSEC2	X:53262057-53350522	1.29694	1.43412e-07	5.32474e-06	yes
BAK1	6:33540323-33548070	1.2967	5.98801e-11	4.86048e-09	yes
SNCA	4:90472506-90763129	1.29667	4.87316e-05	0.000826271	yes
JOSD2	19:51009254-51014615	1.29644	0.00111542	0.0117146	yes
KRT16	17:39766029-39769005	1.29633	1.48104e-13	1.88339e-11	yes
-	3:58168844-58171090	1.296	0.00514343	0.0391572	yes
SRGAP2P1	1:121102016-121204983	1.29399	6.16563e-08	2.46949e-06	yes
CALHM2	10:105206164-105222452	1.29383	0.00121129	0.0124894	yes
FZD7	2:202899309-202903160	1.29031	0	0	yes
LYPD3	19:43964945-43969831	1.28818	2.88658e-15	4.73647e-13	yes
ANPEP	15:90328114-90358633	1.28791	5.67023e-07	1.78041e-05	yes
ARMC12	6:35701643-35716856	1.28785	0.00253656	0.0227159	yes
GADD45G	9:92219844-92221471	1.28746	9.73044e-07	2.83371e-05	yes
PSD	10:104162375-104192470	1.28463	0.00151936	0.0149777	yes
SIRPA	20:1874942-1920543	1.28454	9.54792e-15	1.42844e-12	yes
EIF4EBP1	8:37887858-37917883	1.28448	1.51817e-10	1.12674e-08	yes
SRD5A3	4:56212275-56251747	1.28426	0.000303056	0.00397306	yes
TFAP4	16:4307186-4323001	1.28351	0.000365977	0.00467348	yes
IGFBP6	12:53491219-53496129	1.28228	3.04955e-10	2.10571e-08	yes
FAM110A	20:814357-837992	1.28189	0.00126239	0.0129029	yes
GADD45A	1:68150743-68154021	1.28158	1.10868e-08	5.45756e-07	yes
NLRC5	16:57023396-57117443	1.28142	0.000677654	0.0077287	yes
CITED4	1:41326728-41328018	1.28029	4.51985e-05	0.000774977	yes
SERPINB5	18:61143993-61172318	1.27784	0	0	yes
POLE4	2:75185618-75197255	1.27762	2.84678e-05	0.000520261	yes
AMY2B,RNPC3	1:104068312-104122156	1.27643	0.00282266	0.0245575	yes
PHLDA2	11:2949502-2950685	1.27523	2.22045e-16	4.2355e-14	yes
C17orf51	17:21428050-21477781	1.27493	5.25804e-05	0.000880764	yes
SPTSSB	3:161062579-161090668	1.27426	4.64423e-10	3.01579e-08	yes
S100A10	1:151955390-151966866	1.27333	2.22045e-16	4.2355e-14	yes
ARHGEF4	2:131588550-131804836	1.27109	0.00327197	0.0276929	yes
GIMAP8	7:150147717-150176480	1.2679	0.00155463	0.0152807	yes
USP18	22:18632665-18688682	1.26691	0.00510879	0.0389411	yes
SRMS	20:62169710-62178857	1.26164	2.46952e-07	8.5473e-06	yes
RND3	2:151324708-151395525	1.25937	1.23928e-11	1.13924e-09	yes
FADS2	11:61566997-61659523	1.25929	1.39462e-07	5.21615e-06	yes
C1orf106	1:200860175-200884863	1.25874	3.08522e-07	1.0509e-05	yes
MANSC1	12:12482197-12503475	1.25869	8.12149e-09	4.09023e-07	yes
RNF43	17:56429860-56494933	1.25748	9.10778e-06	0.000191176	yes
ALOX15B	17:7942357-7952463	1.25272	1.11022e-15	1.94736e-13	yes
TNS4	17:38625933-38657905	1.25028	4.68965e-08	1.97146e-06	yes
FAM214B	9:35104108-35115999	1.24993	3.41336e-11	2.93161e-09	yes
HBEGF	5:139712427-139726216	1.24961	0	0	yes
NCS1	9:132934856-132999583	1.2477	0.000109188	0.00167795	yes
MCTP1	5:93488670-94620279	1.24727	1.42368e-06	3.92156e-05	yes
OSBPL5	11:3107992-3187969	1.24672	8.00571e-06	0.000172066	yes
BCL7A	12:122445339-122499948	1.24648	4.80328e-08	1.99722e-06	yes
CHST3	10:73724122-73773322	1.24436	3.32599e-10	2.27599e-08	yes
LINGO4,RORC	1:151772739-151804348	1.24334	0.00108764	0.0114544	yes
PINX1,SOX7	8:10581277-10697394	1.24251	1.21125e-06	3.39773e-05	yes
HR	8:21971887-21990897	1.24013	0.00296238	0.0255686	yes
S100A16	1:153579361-153585644	1.23912	0	0	yes
MAFB	20:39314487-39317960	1.23891	1.13687e-13	1.49557e-11	yes
NRG1	8:31496901-32625623	1.23736	1.03928e-05	0.000214606	yes
PSCA	8:143738362-143764743	1.23589	5.77316e-15	8.89883e-13	yes
-	10:102488871-102491913	1.23449	2.19613e-05	0.000414764	yes
GCNT2	6:10492455-10629796	1.23178	0.00616227	0.0449075	yes
DTX4	11:58938902-58980452	1.23163	1.29088e-08	6.29354e-07	yes
TNC	9:117782805-117880536	1.22944	1.04613e-07	4.00099e-06	yes
ZNF205	16:3162246-3170668	1.22579	1.05051e-05	0.00021634	yes
MAP1S	19:17830290-17845322	1.22479	0	0	yes
SLC2A1	1:43391518-43424643	1.22429	2.30926e-14	3.2629e-12	yes
C14orf43	14:74181824-74269973	1.22318	9.62485e-09	4.75325e-07	yes
CHGB	20:5892075-5906007	1.22187	1.59796e-06	4.35445e-05	yes
FTH1P7	13:23270161-23270713	1.21884	2.12495e-07	7.5236e-06	yes
-	5:36378464-36399103	1.21796	0.00258105	0.0230072	yes
GALNTL4	11:11268957-11643552	1.21774	4.28202e-05	0.000740018	yes
CASP4	11:104813592-104840163	1.21635	6.48786e-06	0.00014307	yes
SNCG	10:88695296-88784489	1.21544	8.24871e-06	0.00017507	yes
APOL2	22:36622255-36636000	1.21445	0.00353433	0.0293918	yes
HMGA1	6:34204576-34217247	1.21346	1.70752e-13	2.10135e-11	yes
PTX3	3:156891892-157251408	1.21283	7.10543e-15	1.08429e-12	yes
TRIM69	15:45021185-45060027	1.21121	6.22988e-05	0.00102444	yes
BRI3	7:97881690-98030380	1.21107	1.26493e-10	9.69988e-09	yes
FAM46B	1:27331510-27339327	1.20933	1.87494e-10	1.3459e-08	yes
PPP1R18	6:30644163-30655672	1.20766	1.79856e-14	2.56505e-12	yes
DNAJC15	13:43597338-43683746	1.20654	0.000129088	0.00193505	yes
SEZ6L2	16:29882479-29910868	1.20405	0.00534186	0.0402155	yes
ZFP36L2	2:43393799-43823208	1.20221	0	0	yes
EEF1A2	20:62119365-62130505	1.20166	2.2004e-08	1.01752e-06	yes
TNRC18	7:5346420-5465045	1.19903	0.000116465	0.00177194	yes
CD99L2	X:149934809-150067289	1.19791	7.0464e-08	2.7785e-06	yes
SLC35D2	9:99075733-99145992	1.19758	2.46441e-05	0.000457745	yes
GBP3	1:89472294-89488577	1.19725	3.73213e-05	0.000658408	yes
MFSD2A	1:40420801-40435638	1.19587	1.51652e-06	4.16226e-05	yes
ATP5G2	12:54026509-54071192	1.19551	1.67289e-10	1.22145e-08	yes
AP1S1	7:100797677-100804877	1.19543	6.87894e-13	7.77575e-11	yes
RPSAP9	X:86958276-86959307	1.19515	3.86089e-05	0.000675656	yes
TNFSF15	9:117546915-117568521	1.19482	6.93423e-12	6.7399e-10	yes
ZNF213	16:3185056-3192804	1.19425	2.07013e-08	9.66083e-07	yes
KIRREL	1:157963062-158070052	1.1939	5.63805e-07	1.77395e-05	yes
ACACA	17:35441895-35766922	1.19316	1.11022e-14	1.61352e-12	yes
CCDC85A	2:56401874-56613308	1.19239	3.17242e-05	0.000571561	yes
PPP2R2C	4:6322304-6565327	1.18831	0.000687878	0.00781338	yes
GABRE	X:151121595-151143152	1.18786	0.00553081	0.041211	yes
CHKA	11:67806357-67888736	1.18782	0.000147601	0.00215539	yes
MAML3	4:140586921-141075338	1.18771	0.000152629	0.00220979	yes
PLCH2	1:2357418-2436969	1.1875	0.00111902	0.0117444	yes
LIMK1	7:73497262-73536855	1.18529	4.45679e-10	2.93149e-08	yes
NXPH4	12:57610577-57620439	1.18525	3.22342e-05	0.000579381	yes
IPO5	13:98605741-98676551	1.1849	2.44531e-08	1.10728e-06	yes
FAM100B	17:74261282-74267375	1.1794	0	0	yes
HSPB1	7:75931860-75933612	1.17803	1.15024e-07	4.37721e-06	yes
CAMKK1	17:3763608-3796338	1.17773	0.00148536	0.0147473	yes
-	X:148397575-148397714	1.17473	3.84137e-13	4.50918e-11	yes
SRCIN1	17:36686258-36762183	1.17402	5.30394e-05	0.000885537	yes
FOXD2	1:47897804-47906363	1.17247	0.000734583	0.00824245	yes
KLF8	X:56258798-56317942	1.17222	5.21008e-05	0.000873691	yes
OSBPL1A	18:21741900-21977823	1.16969	5.98343e-05	0.000990315	yes
SMOX	20:4101626-4168394	1.16723	2.57132e-06	6.59468e-05	yes
XBP1	22:29190542-29196585	1.167	2.22045e-16	4.2355e-14	yes
CLIC1,DDAH2	6:31694584-31707540	1.1666	2.22045e-16	4.2355e-14	yes
LAPTM5	1:31205315-31261715	1.16633	1.21966e-10	9.40001e-09	yes
SLC12A7	5:1050497-1130853	1.16564	0.000101053	0.00156715	yes
SPTLC2	14:77972339-78083116	1.16383	6.57526e-08	2.61625e-06	yes
CANT1,LGALS3BP	17:76967335-77005899	1.16193	0	0	yes
S100P	4:6694795-6698897	1.16109	0.000224664	0.00307753	yes
NCOA5	20:44689623-44718591	1.15868	8.06363e-09	4.07453e-07	yes
NDUFS7	19:1383525-1396466	1.15823	6.06127e-05	0.000999946	yes
PDCD4	10:112629500-112679154	1.15756	2.96487e-06	7.41705e-05	yes
CDCP1	3:45123769-45187914	1.15673	0	0	yes
LRRFIP1,RBM44	2:238536218-238751451	1.1562	8.34084e-05	0.00132514	yes
SGCB	4:52886871-52904648	1.15457	0.00685676	0.0488032	yes
ECSIT,ZNF653	19:11594244-11639987	1.15202	5.62762e-07	1.77395e-05	yes
SPRY4	5:141689991-142608576	1.14915	7.77156e-15	1.1742e-12	yes
PYGB	20:25228690-25371619	1.14887	1.35227e-09	7.93678e-08	yes
ACVR1B	12:52345450-52390862	1.14777	5.58451e-08	2.27252e-06	yes
LTBP4	19:41099071-41135888	1.14665	0.0012107	0.0124894	yes
SYBU	8:110586206-110704020	1.14569	9.69199e-08	3.72543e-06	yes
DNAJB12	10:74090176-74114988	1.14471	2.79854e-06	7.07048e-05	yes
SYT8,TNNI2	11:1848708-1862910	1.14402	2.35287e-07	8.23504e-06	yes
UBE2L6	11:57319128-57335757	1.14373	1.57891e-10	1.16397e-08	yes
FPR1	19:52249026-52255150	1.1433	1.15568e-10	8.95209e-09	yes
NOTCH1	9:139388893-139440314	1.14121	3.92353e-13	4.57046e-11	yes
KLF10	8:103661006-103668130	1.13976	1.84586e-12	2.01198e-10	yes
SPRED1	15:38544323-38649450	1.13885	1.92011e-07	6.87812e-06	yes
SULF2	20:46130486-46415701	1.13797	0.00659797	0.0473589	yes
HN1	17:73131342-73150778	1.1376	9.08378e-07	2.67603e-05	yes
PITPNM2	12:123468026-123635354	1.13588	1.55203e-05	0.000304813	yes
MT1X	16:56716335-56721719	1.13557	4.42346e-05	0.000759302	yes
ALDH3B1	11:67776047-67797928	1.13521	0.000809502	0.00894497	yes
-	4:49285665-49310932	1.13221	0.00412638	0.0332112	yes
GOLT1A,KISS1	1:204159468-204183220	1.13113	0.000986466	0.0105195	yes
FTH1P10	5:17353803-17355008	1.13074	8.32912e-08	3.2507e-06	yes
ZSCAN16	6:28089696-28107456	1.12825	1.58604e-07	5.81804e-06	yes
TTYH3	7:2671584-2704436	1.12667	2.42922e-07	8.44416e-06	yes
MREG,PECR	2:216807556-216967506	1.12666	1.13735e-06	3.22004e-05	yes
AFAP1	4:7760440-7942023	1.12592	1.2824e-06	3.57106e-05	yes
HHAT	1:210501595-210852507	1.12572	2.51137e-05	0.000465091	yes
FXYD5	19:35645627-35660787	1.12485	8.91132e-12	8.39424e-10	yes
ENG	9:130577290-130617376	1.12162	2.7921e-07	9.53186e-06	yes
KRT7	12:52626303-52715182	1.12001	0.00140412	0.0141152	yes
CTSC	11:88026772-88070955	1.11977	0.000396461	0.00497533	yes
CRTAP	3:33155407-33189285	1.11973	3.93259e-07	1.29614e-05	yes
GJB3	1:35175645-35325417	1.11924	1.32894e-12	1.46774e-10	yes
ABLIM3	5:148521029-148722241	1.11837	2.75402e-06	6.99274e-05	yes
PDGFA	7:536199-564869	1.11648	1.08494e-05	0.000221933	yes
PLK2	5:57749808-57756087	1.11585	0.000111004	0.00169902	yes
ABCC2,CUTC,ENTPD7	10:101419257-101612746	1.11539	0.000405462	0.00505089	yes
KCTD15	19:34286662-34306669	1.11414	2.39008e-07	8.32707e-06	yes
HERC6	4:89299824-89364263	1.11333	0.00433872	0.0345558	yes
SDF2L1	22:21996549-21998587	1.1106	3.70397e-05	0.000654197	yes
PLEKHM1	17:43513186-43568146	1.10987	3.55271e-15	5.76749e-13	yes
HDAC9	7:18126571-19157676	1.10891	0.00244767	0.0220884	yes
-	16:3054815-3059053	1.10712	0.000491684	0.00590882	yes
TNKS1BP1	11:57067035-57092426	1.10489	0.000139107	0.00205798	yes
DYSF	2:71680677-71914062	1.10265	0.0018535	0.0176227	yes
NUP210	3:13357736-13461809	1.10128	0.000238488	0.00324361	yes
NEK2	1:211836113-211848963	1.10107	0.00213442	0.0196686	yes
HLA-F	6:29690551-29716826	1.09935	1.31345e-05	0.00026338	yes
LDLRAD3	11:35965530-36253778	1.09894	6.83661e-08	2.70978e-06	yes
PLEKHG5,TNFRSF25	1:6484847-6580121	1.0971	0.000243239	0.0032994	yes
IFIT3	10:90973325-91180758	1.09709	9.37712e-05	0.00146164	yes
C5orf32	5:139554226-139682768	1.09633	1.26529e-08	6.18859e-07	yes
NIPAL2	8:99202056-99306621	1.09504	0.00313332	0.026697	yes
BHLHE40	3:4938492-5027008	1.09277	1.94014e-07	6.91743e-06	yes
CD276	15:73976306-74006859	1.09108	3.62577e-05	0.000643363	yes
FAT4	4:126237553-126414087	1.09097	4.88931e-06	0.000112705	yes
KCNN4	19:44267880-44287391	1.09034	1.78828e-09	1.03368e-07	yes
PSTPIP2	18:43563500-43652240	1.08978	3.40256e-06	8.32102e-05	yes
PKN1	19:14544168-14582678	1.08909	8.88178e-16	1.59454e-13	yes
PC	11:66511921-66726182	1.08816	0.000283768	0.00375894	yes
-	7:134154761-134155835	1.08718	1.28688e-10	9.81887e-09	yes
SLC16A3	17:80186292-80235724	1.08711	1.39079e-06	3.84777e-05	yes
FTH1	11:61717292-61735132	1.086	3.35711e-09	1.84944e-07	yes
KLF13	15:31619057-31727868	1.0848	6.66134e-16	1.22472e-13	yes
SSR2	1:155978838-155990750	1.08316	3.97704e-12	4.10065e-10	yes
KRT18	12:53290970-53346686	1.08298	1.04362e-09	6.22094e-08	yes
C19orf33	19:38794199-38806606	1.08148	6.58349e-08	2.61625e-06	yes
ARSJ	4:114765113-114901673	1.07895	5.5085e-10	3.51715e-08	yes
PHC2	1:33772366-33896653	1.07649	7.65468e-11	6.02115e-09	yes
CORO2B	15:68871307-69020145	1.07368	0.00483991	0.0375672	yes
EFNB3	17:7608519-7614696	1.07201	4.69295e-05	0.000800237	yes
CTD-2124B20.1.1	18:6462142-6463009	1.07058	1.16442e-11	1.08348e-09	yes
UST	6:149068449-149398126	1.0679	0.00457149	0.0359778	yes
CPT1A	11:68522087-68611878	1.06762	5.75715e-11	4.69808e-09	yes
RAB32	6:146864828-146876101	1.06708	8.72635e-14	1.15795e-11	yes
NNMT	11:113930297-114227293	1.06539	0.000295917	0.00388949	yes
GSTP1	11:67351065-67354131	1.06504	7.26086e-14	9.71936e-12	yes
MLKL	16:74705754-74734789	1.06241	0.000335851	0.00435437	yes
TMEM205	19:11453451-11457091	1.06225	1.39185e-06	3.84777e-05	yes
FOXF2	6:1390068-1395832	1.06186	0.00099884	0.0106441	yes
GJB4,GJB5	1:35175645-35325417	1.05973	2.55382e-05	0.000471808	yes
GDF15	19:18485508-18500473	1.05849	0	0	yes
NUCB1	19:49403306-49426528	1.05835	4.46222e-07	1.4488e-05	yes
KATNB1	16:57769641-57791162	1.05826	0.00134249	0.0135672	yes
DUSP5	10:112257595-112275277	1.05702	2.24278e-05	0.000422528	yes
CEBPB	20:48807251-48809220	1.05594	2.12586e-12	2.30075e-10	yes
CD247,CREG1	1:167399876-167523004	1.05565	2.22045e-16	4.2355e-14	yes
-	2:98239107-98252872	1.05552	0.00128021	0.0130673	yes
RPSA	3:39448179-39453929	1.05394	3.9968e-15	6.42013e-13	yes
COL17A1	10:105791043-105845953	1.05339	6.41798e-05	0.00104635	yes
HABP4	9:99212482-99382112	1.05314	0.00500555	0.0384229	yes
CEACAM19	19:45172186-45187633	1.05258	0.00141997	0.0142371	yes
CDC42EP1	22:37956453-37965413	1.05202	1.85811e-10	1.34383e-08	yes
PTPRE	10:129705324-129884119	1.05157	0.00273836	0.0240295	yes
-	22:44311798-44319372	1.05054	9.15247e-07	2.69107e-05	yes
-	6:94542430-94542644	1.05033	0.00685601	0.0488032	yes
SGPL1	10:72575661-72640930	1.05026	5.1019e-05	0.000861228	yes
NFIL3	9:94171326-94186768	1.0494	2.09804e-09	1.19019e-07	yes
-	12:120426978-120427507	1.04756	9.41944e-06	0.000196367	yes
SLC36A1	5:150816606-150871949	1.04227	0.00543091	0.0407052	yes
SNX22	15:64443913-64455404	1.03794	0.00331957	0.0279717	yes
GPR137B	1:236305831-236445319	1.03597	8.86909e-05	0.00139528	yes
MYO1D	17:30819627-31205655	1.03581	4.10783e-14	5.59691e-12	yes
TNK2	3:195590234-195638816	1.03556	0.000200195	0.00280335	yes
FAM178A	10:102672129-102724893	1.0349	2.3053e-05	0.000432173	yes
TNFSF14	19:6661279-6672358	1.03354	0.00190462	0.0179574	yes
-	3:136730025-136733973	1.03272	0.000952681	0.0102199	yes
NDUFS5	1:39491989-39500308	1.03261	4.76781e-10	3.08291e-08	yes
ANKUB1,PFN2	3:149478891-149942977	1.03163	8.84809e-05	0.00139341	yes
SAA1	11:18287720-18291524	1.03159	6.66134e-16	1.22472e-13	yes
GPX1	3:49394608-49396033	1.03125	4.88498e-15	7.68503e-13	yes
GPAM	10:113909623-113987434	1.03072	2.93011e-06	7.34211e-05	yes
CTC-575D19.1.1	5:168043316-168044059	1.03011	0.00131067	0.0133161	yes
SLC16A2	X:73640637-73758044	1.0291	9.53233e-09	4.72284e-07	yes
KIAA1024,TMED3	15:79603403-79764632	1.02882	5.16254e-12	5.1156e-10	yes
SCN3B	11:123499894-123525952	1.02832	0.00180936	0.0172892	yes
DHDDS,HMGN2	1:26758772-26802463	1.02808	0.00192356	0.018086	yes
RPS6KA1	1:26856251-26901521	1.0274	0.00161912	0.0157913	yes
UNC119	17:26873724-26879659	1.02618	0.000452438	0.00553636	yes
IFIH1	2:163102365-163695240	1.02498	8.83403e-07	2.63296e-05	yes
EFEMP1	2:56093101-56151274	1.02495	2.37204e-07	8.28313e-06	yes
EFNB1	X:68048839-68062004	1.02433	2.33011e-11	2.05535e-09	yes
LDOC1	X:140269933-140271373	1.02342	2.97757e-05	0.000539	yes
AKT1	14:105235685-105262088	1.02299	1.6946e-07	6.12786e-06	yes
HIVEP1	6:12007902-12165232	1.02077	0.0027878	0.0243815	yes
SMPD1	11:6411647-6416228	1.02045	2.40197e-05	0.000447547	yes
GRB10	7:50657759-50861159	1.02038	0.000180227	0.00256554	yes
-	19:46692286-46706432	1.01999	2.82974e-09	1.57598e-07	yes
SLC41A3	3:125724887-125820404	1.01938	1.97462e-05	0.000376189	yes
GIT1	17:27900485-27916645	1.01825	4.01101e-12	4.10792e-10	yes
IFNGR2	21:34757298-34853499	1.01819	6.0924e-07	1.90123e-05	yes
PPIB	15:64443913-64455404	1.01708	9.48801e-11	7.42498e-09	yes
DDX60	4:169115615-169239958	1.01627	0.00053353	0.00633592	yes
NDE1	16:15737123-15950890	1.01622	0.000375187	0.00476715	yes
ACOT2,ACOT4	14:74033884-74063200	1.0158	1.61236e-07	5.8722e-06	yes
CBX4	17:77806954-77813228	1.01527	4.95582e-07	1.59554e-05	yes
KIAA0284	14:105330658-105363137	1.01501	3.41023e-08	1.47423e-06	yes
PHF19	9:123617975-123639606	1.01466	1.07308e-05	0.000219802	yes
B3GAT3	11:62382767-62389647	1.01439	9.07239e-06	0.000190695	yes
ZNF329	19:58637696-58666477	1.01231	0.000533456	0.00633592	yes
CLDN4	7:73213871-73256865	1.01064	1.24816e-08	6.1244e-07	yes
FAM210B	20:54933970-54943719	1.00972	1.42109e-13	1.85348e-11	yes
WFS1	4:6271575-6304992	1.00889	8.07064e-06	0.000172975	yes
LTBP3	11:65292542-65326401	1.00552	0.000589211	0.0068584	yes
ANKRD13B	17:27916800-27950053	1.00477	0.000151008	0.00219256	yes
CD34	1:208057593-208084747	1.00337	6.4448e-11	5.17619e-09	yes
KRT6A	12:52880957-52887041	1.00249	1.33227e-15	2.31027e-13	yes
SCPEP1	17:55055461-55084127	1.0015	6.1906e-13	7.0499e-11	yes
CALM3	19:47104565-47114040	1.00128	2.70575e-09	1.51245e-07	yes
DHRS7	14:60558628-60636574	1.00113	2.15356e-08	9.98886e-07	yes
PLEKHM2	1:16010826-16076391	1.00036	1.61482e-05	0.000315925	yes
AMPD2	1:110158631-110174673	0.99864	0.00045148	0.0055338	yes
FTL	19:49468484-49496637	0.998404	4.66294e-15	7.41213e-13	yes
HSPA4L	4:128702975-128759939	0.997415	9.12024e-05	0.00143184	yes
CUX1	7:101459218-101927250	0.996685	6.21287e-05	0.00102274	yes
ASAP3	1:23707553-23810750	0.99479	0.00477607	0.0371283	yes
MAN2B2	4:6576899-6625089	0.9942	5.18467e-05	0.000870386	yes
IL1RN	2:113835599-113891593	0.994113	0.000197551	0.0027759	yes
ERMAP	1:43271350-43312093	0.993499	0.00052664	0.00626386	yes
ATP9A	20:50213052-50385173	0.991355	1.08568e-06	3.10233e-05	yes
PKP2	12:32943657-33049774	0.990319	2.35351e-06	6.08722e-05	yes
ADAT3,SCAMP4	19:1905370-1926012	0.988653	2.00508e-05	0.000381516	yes
PXDC1	6:3722840-3752260	0.987268	9.56688e-08	3.68663e-06	yes
CBX6	22:39257454-39268319	0.987056	1.93473e-06	5.14355e-05	yes
FRY	13:32599450-32873192	0.986401	0.00295991	0.0255679	yes
COMMD6	13:76099349-76123575	0.98635	0.000417182	0.00518842	yes
EFHD2	1:15736381-15756839	0.985598	4.54179e-09	2.42335e-07	yes
ITPRIP	10:105995113-106098394	0.984283	4.57111e-10	2.99378e-08	yes
ZNF217	20:52169308-52251129	0.982886	1.61999e-05	0.000316531	yes
FBXO27	19:39514664-39523198	0.981432	0.000577934	0.00675807	yes
ANGPTL4	19:8429010-8439257	0.980917	5.18229e-05	0.000870386	yes
ATF5	19:50392915-50464429	0.980059	4.95601e-07	1.59554e-05	yes
SCARB1	12:125261605-125367214	0.97808	6.96005e-06	0.000151946	yes
-	9:15163711-15166954	0.977798	0.000488872	0.00589273	yes
INPP5D	2:233924676-234116549	0.977609	6.41629e-06	0.000141697	yes
MYLIP	6:16129326-16148676	0.975044	3.6384e-11	3.09576e-09	yes
SEL1L3	4:25749047-25931435	0.974695	0.000101348	0.00157013	yes
XXYLT1	3:194787629-194991896	0.973024	0.00182362	0.0174036	yes
RALB	2:120997639-121052285	0.972316	0.000242798	0.00329635	yes
PLXDC2	10:20104898-20590547	0.972041	4.53991e-08	1.91909e-06	yes
QSOX1	1:180123958-180173165	0.97198	4.64303e-08	1.95725e-06	yes
ALKBH7	19:6369434-6377338	0.971823	0.000164225	0.00235784	yes
RNF26	11:119205236-119208023	0.971644	2.05992e-09	1.17292e-07	yes
CHID1	11:867356-915058	0.971622	0.000311151	0.00407218	yes
BTBD2	19:1985446-2029073	0.971132	5.31222e-08	2.17915e-06	yes
MRPL41	9:140445650-140447007	0.9699	2.31649e-07	8.14506e-06	yes
ZC3H12C	11:109963232-110042761	0.968327	5.38531e-08	2.20321e-06	yes
CUEDC1	17:55938975-56032684	0.967737	1.00452e-05	0.000208557	yes
HSPA5	9:127997131-128003661	0.967639	1.77849e-08	8.45474e-07	yes
HEXB	5:73923233-74162776	0.967251	0.000227484	0.00311058	yes
TRIM29	11:119981982-120056237	0.967115	1.13963e-06	3.2205e-05	yes
STMN3	20:62271060-62284837	0.966947	0.00607604	0.0444063	yes
RAB26	16:2190803-2204424	0.966825	0.000446658	0.00549678	yes
-	9:42236370-42237185	0.965496	0.00165967	0.0160906	yes
PHLDA3	1:201431790-201438375	0.964866	2.61165e-09	1.46521e-07	yes
PRICKLE2	3:64053639-64440508	0.964307	0.00137295	0.0138237	yes
MMP15	16:58059469-58080805	0.963764	0.000347914	0.00449929	yes
DPM3	1:155112366-155113071	0.963737	5.56755e-07	1.75902e-05	yes
PSME2	14:24612572-24636611	0.962529	0.000513401	0.00613508	yes
TRIM21	11:4406126-4414926	0.959901	2.41712e-05	0.00044982	yes
FAM156B	X:52920335-52937587	0.959747	0.00263278	0.0233176	yes
TP53I13	17:27894168-27900172	0.959292	5.43341e-05	0.000905172	yes
DDT	22:24303669-24326106	0.959171	4.85037e-06	0.000111977	yes
LSM7	19:2321521-2328614	0.958946	8.30272e-05	0.00132254	yes
CCDC71L	7:106012696-106372895	0.958931	0.000368478	0.00469364	yes
AL591684.1,ANXA8	10:48255252-48279199	0.954308	0.000221554	0.00304312	yes
GAB2	11:77850816-78285919	0.952553	0.00116814	0.0121512	yes
SERTAD4	1:210404693-210419976	0.952321	0.00464349	0.0363756	yes
SDC3	1:31342313-31381608	0.950894	2.07018e-08	9.66083e-07	yes
CTU1	19:51600862-51611647	0.949648	0.000131041	0.00195473	yes
ECE1	1:21543739-21671997	0.94958	5.09846e-06	0.000116645	yes
MMP28	17:34082810-34123165	0.949165	2.78737e-06	7.05394e-05	yes
KLF6	10:3818187-3827473	0.948976	1.68062e-09	9.75142e-08	yes
SLC39A3	19:2729878-2740074	0.947164	0.000253772	0.00341495	yes
NME1,NME1-NME2,NME2	17:49230896-49249108	0.946376	1.84042e-11	1.65846e-09	yes
GRN	17:42422490-42430489	0.94493	4.17222e-13	4.82334e-11	yes
CBX2	17:77751976-77761471	0.943707	0.00111532	0.0117146	yes
MEX3D	19:1554668-1568057	0.943057	3.52794e-06	8.55905e-05	yes
RHBDF2	17:74466863-74497508	0.942568	2.21945e-05	0.00041865	yes
AEN	15:89164526-89175514	0.941873	4.41256e-06	0.000102646	yes
AL162389.1	9:110496099-110605138	0.941644	0.00598604	0.0438536	yes
GPI	19:34855644-34893318	0.941604	1.69864e-13	2.10135e-11	yes
FOSL1	11:65656010-65668504	0.940522	1.07185e-05	0.000219802	yes
S100A5,S100A6	1:153506078-153515026	0.939683	3.69175e-08	1.57804e-06	yes
SQSTM1	5:179223858-179334883	0.939191	0.000914557	0.00986997	yes
FBN2	5:127593466-128369335	0.937844	4.76999e-06	0.000110288	yes
PTPRS	19:5173976-5340814	0.937606	1.42149e-05	0.000282815	yes
ARHGDIB	12:15094950-15115614	0.936567	1.0301e-06	2.95578e-05	yes
UBL4A	X:153712054-153715009	0.936513	3.22767e-05	0.000579461	yes
SLC6A8	X:152935184-152962048	0.936309	0.00277952	0.0243347	yes
TMEM222	1:27648558-27662891	0.934782	6.04564e-05	0.000998447	yes
NXN	17:702335-883010	0.934426	0.00102034	0.0108401	yes
C9orf167	9:140172200-140177093	0.934403	3.41172e-12	3.54169e-10	yes
MANBAL	20:35918040-35945663	0.934202	3.70779e-06	8.85872e-05	yes
TPBG	6:83071703-83080545	0.934043	3.24896e-12	3.44299e-10	yes
MTND2P28	1:536815-660287	0.933886	5.92049e-06	0.000131701	yes
-	17:77776730-77778307	0.933315	0.00219481	0.0201401	yes
LEAP2,UQCRQ	5:132196872-132210938	0.933169	8.18948e-07	2.46979e-05	yes
ARHGDIA	17:79819939-79829282	0.932101	1.30007e-12	1.44811e-10	yes
NGFRAP1	X:102631267-102633005	0.931743	4.11514e-07	1.35047e-05	yes
LPCAT1	5:1456594-1524092	0.931306	2.11837e-10	1.48286e-08	yes
UBE2O	17:74385504-74449288	0.931189	2.47295e-07	8.5473e-06	yes
C1QTNF1	17:77015290-77045870	0.93102	0.000478082	0.00578551	yes
CTSA	20:44517263-44540794	0.929354	3.68107e-09	2.01337e-07	yes
-	8:136754448-137190391	0.928985	1.17365e-05	0.000238482	yes
SOX12	20:300284-335512	0.927859	1.08879e-06	3.10233e-05	yes
PLOD1	1:11994261-12035645	0.927618	1.55358e-08	7.47876e-07	yes
NENF	1:212606228-212619714	0.927158	7.53222e-08	2.96241e-06	yes
TSPO	22:43547519-43559250	0.9254	5.3477e-11	4.4351e-09	yes
NLGN2	17:7308179-7323179	0.924987	1.87515e-05	0.000360843	yes
CAT	11:34460471-34493609	0.924895	3.74526e-05	0.000659962	yes
PVRL2	19:45349392-45392485	0.924803	6.57883e-09	3.42638e-07	yes
MAP4	3:47844207-48130769	0.924562	0.00372832	0.0306047	yes
HIST3H2A	1:228645064-228645560	0.92438	9.05107e-07	2.67468e-05	yes
BRPF3	6:36114474-36200567	0.924281	4.48913e-06	0.00010411	yes
CCNA1	13:37005963-37017067	0.92355	8.04681e-09	4.07453e-07	yes
SLC9A1	1:27425305-27493472	0.922055	0.00597575	0.0438203	yes
PLOD3	7:100849185-100867476	0.922006	0.00652026	0.0469557	yes
FZD6	8:104133259-104345094	0.921112	6.10038e-08	2.44979e-06	yes
FZD8	10:35925773-35931208	0.921041	0.00014302	0.00210259	yes
SERPINA3,SERPINA4,SERPINA5	14:95027427-95093365	0.920991	5.65868e-08	2.29658e-06	yes
BBC3	19:47724078-47736248	0.920519	0.000886734	0.0096248	yes
PHKA1P1	1:91358548-91359169	0.920289	0.000981535	0.0104816	yes
RPS8	1:45205489-45244451	0.91992	4.46725e-11	3.72515e-09	yes
ANTXR2	4:80822302-81046608	0.919902	1.01997e-05	0.000211191	yes
CCND2	12:4357930-4414516	0.91979	3.35517e-05	0.000600938	yes
RARA	17:38463527-38513895	0.918572	0.00612201	0.0446995	yes
RNF19B	1:33396710-33430286	0.91823	5.49939e-08	2.24387e-06	yes
TXNIP	1:145438468-145442635	0.917986	2.49994e-08	1.12534e-06	yes
RHOD	11:66822927-66839503	0.91559	4.62269e-10	3.01463e-08	yes
RPL7A	9:136193417-136218281	0.914233	2.05115e-10	1.44242e-08	yes
KRT10	17:38974368-38992522	0.913177	1.7519e-06	4.71498e-05	yes
RPS28	19:8386383-8408146	0.912629	4.86922e-12	4.95362e-10	yes
KIAA0889	20:35405844-35492089	0.912603	1.69875e-08	8.12629e-07	yes
AZGP1	7:99564342-99578351	0.911429	1.52103e-10	1.12674e-08	yes
HIC1	17:1958392-1962980	0.911383	0.00238096	0.0215629	yes
ARL4C	2:235401684-235405722	0.911226	1.46921e-06	4.03966e-05	yes
AKT1S1	19:50372294-50392006	0.910779	8.447e-08	3.2883e-06	yes
-	8:146037325-146052646	0.91053	5.99283e-05	0.000990798	yes
IL17RC	3:9958747-9975314	0.91022	0.00675912	0.0483337	yes
BMP2	20:6748310-6760910	0.909679	0.00251089	0.0225396	yes
PPDPF	20:62152076-62153559	0.909076	7.90804e-05	0.00126628	yes
RRBP1	20:17594322-17663108	0.908021	1.64558e-06	4.46032e-05	yes
LPHN2	1:81771844-82458190	0.907634	0.000875117	0.00953197	yes
LARS2	3:45429997-45592613	0.906621	5.19093e-06	0.000117877	yes
CAPN2	1:223889294-223963720	0.905311	1.43849e-05	0.000285453	yes
IL20RB,NCK1	3:136537488-136729927	0.905249	1.52678e-05	0.00030024	yes
ID2	2:8806765-8824583	0.904026	0.000179284	0.00255887	yes
SRI	7:87834227-87856308	0.903779	0.00458243	0.0360267	yes
HSPD1	2:198351304-198418423	0.903109	5.83734e-05	0.000968238	yes
CTSZ	20:57570239-57582302	0.902597	8.25873e-12	7.9263e-10	yes
RILP,SCARF1	17:1537151-1553387	0.901255	0.000840452	0.00923348	yes
ASPH	8:61969716-62627199	0.901068	0.00296401	0.0255686	yes
SCARA3	8:27491384-27534190	0.900462	0.00324983	0.027582	yes
EEA1	12:93115280-93323107	0.897338	0.000839774	0.00923267	yes
PDCD5	19:33072095-33078332	0.896904	2.65954e-07	9.12013e-06	yes
FAM129B	9:130267615-130341268	0.896393	2.50039e-09	1.40797e-07	yes
CEP85,SH3BGRL3	1:26560667-26647014	0.896225	1.31791e-07	4.96574e-06	yes
C1orf31	1:234508552-234519795	0.895146	7.84269e-07	2.37459e-05	yes
PSAP	10:73576048-73611126	0.893251	1.0313e-07	3.9542e-06	yes
RNF24	20:3868885-3996229	0.889853	4.95767e-05	0.000838737	yes
KHNYN	14:24895737-24912111	0.889583	0.000976753	0.0104525	yes
AP2S1	19:47324439-47354247	0.889576	2.29406e-09	1.29657e-07	yes
SPTBN1	2:54683421-54896812	0.889315	4.79181e-08	1.99722e-06	yes
BNIP1	5:172571164-172591390	0.888962	0.00446568	0.0353456	yes
IMPA2	18:11981180-12030876	0.887355	7.18901e-06	0.000156052	yes
SEPP1	5:42756902-42887494	0.887335	2.77707e-05	0.000509352	yes
CHPF	2:220236548-220586393	0.886789	5.47286e-07	1.73629e-05	yes
KLHL21	1:6650781-6684093	0.886243	2.76086e-06	6.99845e-05	yes
RPL6	12:112842992-112947717	0.885466	1.19802e-05	0.000243108	yes
EIF1	17:39775688-39943183	0.884764	8.51111e-07	2.55668e-05	yes
NKX1-2	10:126132139-126138753	0.882895	7.50803e-07	2.28688e-05	yes
PTGS2	1:186640811-186652127	0.881979	2.47261e-06	6.37364e-05	yes
DOHH	19:3490819-3500938	0.881458	0.000119528	0.00180953	yes
PAQR3	4:79697495-79860592	0.880287	0.00518819	0.0394086	yes
SMPDL3B,XKR8	1:28261474-28294607	0.88027	0.000383969	0.00485047	yes
URM1	9:131125723-131153015	0.880197	2.11046e-06	5.5678e-05	yes
IVD	15:40697685-40728146	0.880051	0.00253251	0.022693	yes
FAM108C1	15:80972024-81047962	0.880034	0.0010694	0.0112779	yes
THBD	20:23026269-23030378	0.879804	0.00117171	0.0121711	yes
ZCCHC3	20:277736-280965	0.878315	5.44619e-06	0.000122942	yes
YBX1P1	14:66479547-66480507	0.87828	5.56665e-06	0.000124922	yes
CLSTN1	1:9711789-9884584	0.877974	4.27673e-10	2.83752e-08	yes
C11orf10	11:61447904-61564716	0.877159	0.000541495	0.00640559	yes
-	1:80162070-80167415	0.87648	1.76249e-06	4.73514e-05	yes
RPS24	10:79792954-79816638	0.876251	7.47957e-09	3.83014e-07	yes
SERINC2	1:31882411-31907529	0.875162	1.4751e-10	1.10343e-08	yes
SGPP2	2:223288620-223427482	0.874508	5.56948e-11	4.56937e-09	yes
RPL41P1	20:21735865-21736171	0.874422	1.33693e-12	1.46774e-10	yes
PATL1	11:59383901-59436554	0.873417	2.73536e-10	1.89735e-08	yes
SLC1A4	2:65215610-65251054	0.872729	0.000895782	0.00970855	yes
GLT25D1	19:17666459-17693965	0.872156	1.55224e-08	7.47876e-07	yes
CTSL1	9:90340433-90346308	0.87204	1.23853e-07	4.70147e-06	yes
ERGIC3	20:34129769-34145407	0.871519	4.75668e-08	1.98869e-06	yes
CDKN1A	6:36555310-36932613	0.870452	3.02166e-06	7.5221e-05	yes
TNFRSF12A	16:3070312-3077756	0.86818	1.96639e-08	9.26145e-07	yes
RPL22	1:6241328-6296032	0.867785	0.000768301	0.00856209	yes
FAM20C	7:182934-307012	0.867687	0.000200239	0.00280335	yes
ADORA2B	17:15848230-15879060	0.867377	4.26196e-05	0.000738224	yes
CYB5R3	22:43013205-43045574	0.866572	4.63346e-07	1.5012e-05	yes
-	10:118239077-118249858	0.865822	5.79426e-08	2.34537e-06	yes
CMTM4	16:66648652-66730610	0.865809	0.00403391	0.0326392	yes
MRPL54	19:3761757-3769021	0.863951	0.000252394	0.00340543	yes
TMEM38B	9:108456824-108538893	0.863456	0.000539139	0.00638267	yes
-	1:192879510-192883965	0.861699	0.00362986	0.0299577	yes
C7orf29,LRRC61	7:149934644-150035239	0.86118	1.67138e-05	0.000325738	yes
CDC42EP4	17:71279763-71308143	0.861109	4.95959e-12	5.01214e-10	yes
PABPC1	8:101698043-101735037	0.860782	0.000173897	0.0024917	yes
HLA-A,HLA-G	6:29794743-29913661	0.86052	5.89466e-09	3.10181e-07	yes
PLXNA1	3:126702088-126756424	0.860089	0.00157537	0.01545	yes
CDK2AP2	11:67273959-67276120	0.85977	2.02994e-06	5.3873e-05	yes
CD63	12:56075329-56124467	0.85934	6.90523e-09	3.54794e-07	yes
PRPF8	17:1553922-1588154	0.859124	7.18359e-12	6.93807e-10	yes
GPR172A	8:145575877-145584941	0.85823	1.36751e-07	5.13915e-06	yes
AVPI1	10:99344079-99447194	0.857814	3.12985e-08	1.37641e-06	yes
-	5:2741940-2743136	0.857336	0.00650986	0.046903	yes
PPIF	10:81107224-81115093	0.855989	1.93612e-07	6.91743e-06	yes
-	5:66551959-66553411	0.855375	6.31788e-05	0.00103334	yes
GNA12	7:2719155-2883958	0.854534	8.11857e-06	0.000173504	yes
RP11-330H6.5.1,TLR9,TWF2	3:52255095-52273186	0.854517	5.42709e-05	0.000905109	yes
HEBP2	6:138723725-139018425	0.853697	0.0017345	0.0166783	yes
ELOVL5	6:53132195-53213947	0.853479	8.12962e-07	2.45659e-05	yes
ITGB4	17:73713473-73761307	0.853463	2.00333e-10	1.41531e-08	yes
C17orf76-AS1,SNORD49A,SNORD49B,SNORD65	17:16342187-16395467	0.853189	3.54217e-07	1.18799e-05	yes
CYR61	1:86046297-86049645	0.851841	2.35247e-08	1.0716e-06	yes
TRAP1	16:3661739-3767565	0.851673	1.73142e-05	0.000335725	yes
TP53	17:7565096-7606820	0.850855	0.00524813	0.0397847	yes
PIM3	22:50354160-50357728	0.850793	1.01619e-09	6.10514e-08	yes
RRM1	11:4115936-4160106	0.850783	0.00170944	0.0164685	yes
JDP2	14:75890385-75940814	0.848631	0.00037857	0.00479417	yes
AP2B1	17:33914281-34053434	0.848466	4.27181e-10	2.83752e-08	yes
DAPK2	15:64199234-64364232	0.848056	0.00559719	0.0415434	yes
PSMD14	2:162164548-162268337	0.847906	3.34557e-05	0.000599923	yes
NDUFS6	5:1786526-1830598	0.847434	0.00161423	0.0157602	yes
HMGB2	4:174252845-174256276	0.845459	2.9996e-06	7.49163e-05	yes
SLC22A15	1:116519118-116613094	0.844998	0.00577383	0.0426263	yes
RPL41	12:56510369-56511727	0.84354	6.17768e-11	4.98791e-09	yes
FOXJ2	12:7917811-8250367	0.842073	4.09049e-06	9.64773e-05	yes
PDIA3	15:43803155-44117000	0.841627	0.0064803	0.0467562	yes
PPP2R4	9:131857072-131911225	0.841156	0.00023315	0.00317666	yes
SEC61A1	3:127770483-128127485	0.840647	1.76335e-05	0.000341049	yes
HSPA8	11:122928196-122934001	0.840109	0.000323826	0.0042056	yes
CCDC88A	2:55506136-55647057	0.840002	0.0055829	0.0414776	yes
CRTC3	15:91073156-91260372	0.839562	0.000693143	0.00785719	yes
PCDHA1,PCDHA10,PCDHA11,PCDHA12,PCDHA13,PCDHA2,PCDHA3,PCDHA4,PCDHA5,PCDHA6,PCDHA7,PCDHA8,PCDHA9,PCDHAC1,PCDHAC2	5:140165875-140392026	0.838691	2.07434e-06	5.48604e-05	yes
-	13:41118120-41127039	0.838202	2.89618e-05	0.000527006	yes
-	1:230736997-230745196	0.837626	8.87934e-12	8.39424e-10	yes
RPL23	17:37004117-37010064	0.83755	5.999e-10	3.78284e-08	yes
PCTP	17:53828355-53854748	0.836517	0.00148155	0.014719	yes
ZCCHC17	1:31769814-31867460	0.835843	0.000120745	0.00182433	yes
LIMS1	2:109150845-109303765	0.835509	0.00040868	0.00508683	yes
RBM10	X:47001614-47046212	0.834555	0.00055478	0.00653236	yes
S100A8	1:153362507-153363664	0.834348	1.50833e-09	8.78517e-08	yes
TMSB10	2:85048773-85141075	0.833988	3.67191e-11	3.09576e-09	yes
GNAI2	3:50263723-50296792	0.833119	5.05336e-07	1.62005e-05	yes
ESRP1	8:95652583-95719694	0.831488	0.000110777	0.00169769	yes
MBOAT7	19:54677102-54697585	0.831379	0.00280952	0.024485	yes
ZBTB40	1:22778311-22857650	0.830473	0.000813703	0.00898151	yes
MIOS	7:7606502-7649256	0.830416	0.000545956	0.00644338	yes
DNAJC9,MRPS16	10:74869724-75119452	0.829403	0.00517874	0.0393608	yes
ACSS1	20:24986867-25039616	0.828926	0.00624254	0.0453625	yes
NSMAF	8:59496061-59572403	0.828918	0.000285297	0.00377264	yes
-	9:35604137-35605269	0.828646	0.000216807	0.00299138	yes
LRRC8A	9:131580752-131680383	0.828228	5.54754e-09	2.93943e-07	yes
EZH1	17:40852291-40897079	0.82816	7.81552e-05	0.00125278	yes
KIAA0232	4:6783101-6885897	0.82806	4.48053e-09	2.39905e-07	yes
NWD1	19:16830302-16928774	0.827752	0.00389251	0.0316778	yes
MAP2K3	17:21187983-21218552	0.824655	3.43444e-06	8.38554e-05	yes
PSMB8,TAP1	6:32808493-32847625	0.824533	4.40072e-07	1.43493e-05	yes
HTR6	1:19991779-20007913	0.823567	0.000452777	0.00553636	yes
CARD10	22:37886399-37915549	0.823133	0.00233682	0.0212261	yes
HSPA1B	6:31795511-31798031	0.82275	3.57794e-10	2.43747e-08	yes
GPATCH1	19:33571785-33621930	0.822648	0.00183168	0.0174696	yes
CDC25B	20:3767577-3786959	0.822509	7.80323e-06	0.000168188	yes
IARS	9:94972488-95056038	0.822265	0.00101003	0.0107409	yes
TMEM161A	19:19229977-19249296	0.822124	0.000391883	0.00492598	yes
-	5:139996874-140003286	0.821877	1.30998e-05	0.00026303	yes
SOX13	1:204042226-204096875	0.81996	0.000151999	0.00220276	yes
NCOA6	20:33302577-33413452	0.817053	3.36948e-08	1.46819e-06	yes
BAIAP2	17:79008939-79156964	0.81703	3.08039e-06	7.65581e-05	yes
PHF15	5:133860002-133918987	0.814525	0.00011978	0.00181154	yes
NELF	9:140339647-140353786	0.814434	0.000870091	0.00949756	yes
-	7:24828186-24832880	0.814159	0.000312132	0.00407803	yes
-	22:32902891-32904294	0.811787	0.000265974	0.00356032	yes
CALD1	7:134429002-134655479	0.811769	2.5031e-07	8.62241e-06	yes
COX7B	X:77154934-77162870	0.81162	0.000359171	0.00460198	yes
TRIM25	17:54965269-54993209	0.811566	2.69716e-08	1.20347e-06	yes
AP1M2	19:10683347-10697992	0.811269	7.56053e-05	0.00121702	yes
BOK	2:242483817-242513635	0.811088	0.00129766	0.0132015	yes
RRAS	19:50138551-50143400	0.811062	2.60104e-05	0.000479371	yes
TRMT2B	X:100224696-100307105	0.810142	0.00303464	0.026024	yes
FUCA2	6:143815116-143832827	0.807874	9.80226e-07	2.84919e-05	yes
RAP1GAP2	17:2699731-2941034	0.807846	0.00136279	0.0137359	yes
ANKRD9	14:102969860-102976136	0.807801	3.32463e-06	8.14347e-05	yes
FAM127B	X:134184961-134186226	0.807754	0.00109209	0.0114933	yes
AREG	4:75310850-75320726	0.806776	0.000802394	0.00887928	yes
MAD2L2	1:11724180-11751707	0.806754	0.000923173	0.00995591	yes
EZR	6:159057505-159241625	0.806529	1.96127e-08	9.26145e-07	yes
BTBD6	14:105675622-105864516	0.802631	0.00149166	0.0148002	yes
KCNK5	6:39120599-39197396	0.80261	1.02156e-09	6.11336e-08	yes
GAS6	13:114462176-114567046	0.80253	2.28924e-08	1.04906e-06	yes
RCN1	11:31806339-32127301	0.802113	2.16794e-07	7.64037e-06	yes
C17orf79	17:30178882-30186310	0.80086	3.69993e-07	1.23277e-05	yes
THSD4	15:71389290-72075722	0.800568	0.000886794	0.0096248	yes
RPL10A	6:35436184-35438562	0.800561	6.06663e-09	3.18133e-07	yes
LMAN2	5:176758561-176778853	0.800142	6.59602e-06	0.000145036	yes
EIF3K	19:39109614-39127595	0.799992	1.21093e-05	0.000245402	yes
GJB2	13:20761608-20767037	0.799783	1.42023e-05	0.000282815	yes
DCTD	4:183792285-183839089	0.799599	0.00561828	0.0416391	yes
NUCB2	11:17229699-17371536	0.799548	0.00122072	0.0125611	yes
STX10	19:13254902-13265724	0.799395	0.00196323	0.0183333	yes
CNNM2	10:104678045-104845255	0.79847	0.00126035	0.0128907	yes
MIR1204,PVT1	8:128806778-129113499	0.797845	0.00530304	0.0400418	yes
ZC3H7B	22:41641614-41756151	0.797167	3.79626e-05	0.000667408	yes
SUMF2	7:56131694-56164402	0.795754	6.57125e-06	0.0001447	yes
C10orf54	10:73156690-73575702	0.795166	0.0019559	0.0182999	yes
SREBF2	22:42196624-42303312	0.795125	3.85228e-05	0.000674923	yes
ERMP1	9:5510544-5833117	0.793678	2.24698e-06	5.85136e-05	yes
PSMD3	17:38137049-38154213	0.793525	2.61545e-08	1.17043e-06	yes
MEX3C	18:48700919-48723690	0.792676	9.28244e-10	5.59882e-08	yes
RPL15P3	6:12514341-12515006	0.792649	4.03435e-06	9.55966e-05	yes
IFI27L2	14:94594115-94596590	0.792235	0.000476885	0.0057802	yes
HERPUD1,SLC12A3	16:56899118-56978068	0.791465	8.44411e-05	0.00133531	yes
HPCAL1	2:10442970-10567743	0.790148	4.16033e-06	9.76718e-05	yes
NDUFA1	X:119004496-119010625	0.789998	2.24834e-08	1.03655e-06	yes
KIFC3	16:57792057-57896957	0.789647	0.000569247	0.00667182	yes
ENTPD6	20:25176328-25210237	0.789355	0.00237011	0.0214774	yes
ST14	11:130029456-130080356	0.789348	7.36416e-07	2.24754e-05	yes
ELF4	X:129197939-129244729	0.789028	5.54954e-06	0.000124906	yes
CCDC149	4:24807330-24981826	0.787108	0.00354303	0.029416	yes
ZNF263	16:3313730-3369996	0.786878	0.000684453	0.00779459	yes
MXRA7	17:74671808-74707087	0.785634	0.000259613	0.00348741	yes
NINJ1	9:95883770-95896891	0.784423	2.91995e-08	1.28782e-06	yes
RPSAP58	19:23945745-24016116	0.784283	3.44883e-07	1.16179e-05	yes
PRRC1	5:126853300-126890782	0.783702	0.000544925	0.00643619	yes
AC008676.1,CYFIP2	5:156687131-157002783	0.783311	0.00261827	0.0232409	yes
CD58	1:116966345-117113661	0.783264	0.000587225	0.0068405	yes
EEF1E1,MUTED,RP1-126E20.3.1,TXNDC5	6:7726331-8130736	0.782818	0.00371591	0.0305193	yes
PGM1	1:63906086-64125916	0.781561	8.26734e-08	3.23486e-06	yes
GTF2H4,VARS2	6:30875960-30896246	0.781258	0.00311337	0.0265716	yes
FGD6,NDUFA12,NR2C1	12:95290830-95611258	0.779659	0.00400583	0.0324464	yes
RTN4R	22:20228937-20270769	0.778463	0.00438006	0.0347851	yes
ARRDC4	15:98462783-98517068	0.776717	0.000207594	0.00288734	yes
CAMK2G	10:75572258-75634343	0.776251	9.32795e-05	0.00145696	yes
SP6	17:45922279-45933240	0.775089	0.00287414	0.0249769	yes
ZSWIM4	19:13906273-13943051	0.77499	1.64441e-07	5.97467e-06	yes
STRA6	15:74445140-74628813	0.774593	5.3233e-06	0.000120704	yes
MDH2	7:75677368-75696826	0.774201	8.33885e-05	0.00132514	yes
UBXN6	19:4445005-4457791	0.773252	2.47569e-07	8.5473e-06	yes
BCL9	1:147013181-147098017	0.772358	0.0050945	0.0388711	yes
KDM6B	17:7737294-7758349	0.772246	2.14483e-06	5.63341e-05	yes
SNAI1	20:48599535-48605423	0.771809	0.000767916	0.00856209	yes
BCAP31	X:152965946-152990152	0.771682	1.08968e-06	3.10233e-05	yes
PSMB7	9:127019884-127177723	0.770942	1.86248e-07	6.69221e-06	yes
ZFHX3	16:72779301-73093597	0.770046	0.000296835	0.0038982	yes
RPL32	3:12837970-12913415	0.76948	5.70313e-07	1.78706e-05	yes
C14orf2	14:104378624-104394606	0.769323	3.64832e-06	8.78579e-05	yes
ENTPD2	9:139942322-139948544	0.76858	0.00474744	0.0369927	yes
-	18:26273746-26274249	0.767681	0.00196428	0.0183333	yes
COMT	22:19863039-20004331	0.767664	0.00387981	0.0316271	yes
SETD1B	12:122150657-122270562	0.767489	3.77571e-06	8.98866e-05	yes
DENND1C	19:6460640-6481798	0.767434	0.000246043	0.00333152	yes
ZNF274	19:58694395-58729277	0.766733	0.000544136	0.00643184	yes
F11R,TSTD1	1:160965000-161008784	0.766246	0.00164509	0.016	yes
SLC25A5	X:118599996-118605282	0.76565	1.63441e-08	7.84311e-07	yes
ANXA1	9:75766672-75785309	0.76556	2.45632e-08	1.10898e-06	yes
GLYATL2	11:58601541-58671688	0.765084	0.00279504	0.0244286	yes
NANS	9:100818952-100881530	0.765029	0.000159329	0.00230033	yes
C7orf30	7:23338357-23510086	0.764549	0.00538672	0.0405046	yes
NCLN	19:3185874-3209572	0.764519	2.50875e-06	6.44728e-05	yes
EVC	4:5712923-5894785	0.764357	0.00298346	0.0257218	yes
CCPG1,DYX1C1-CCPG1	15:55495163-55800432	0.764252	0.00303557	0.026024	yes
GTF2IRD1	7:73868119-74016931	0.763159	3.69522e-06	8.8523e-05	yes
EHD2	19:48216600-48246408	0.762822	7.9621e-09	4.05005e-07	yes
MAL2	8:120177272-120259088	0.762547	1.61076e-06	4.38148e-05	yes
COX17,POPDC2	3:119355303-119396564	0.762185	9.60997e-05	0.00149488	yes
KIAA0182	16:85587285-85722605	0.761737	0.0012169	0.0125303	yes
CDS1	4:85448276-85572491	0.761248	5.04984e-05	0.000853383	yes
MICU1	10:74127097-74385899	0.76074	1.02275e-06	2.94537e-05	yes
UQCRB	8:97237149-97250262	0.760019	9.82187e-05	0.00152629	yes
ADAMTS1	21:28208605-28217728	0.759053	7.76835e-08	3.04743e-06	yes
RAN	12:131356423-131362223	0.758626	4.04862e-06	9.5786e-05	yes
TAGLN2	1:159887896-159895522	0.757731	6.07043e-08	2.44419e-06	yes
NOL12.1,TRIOBP	22:38077679-38173747	0.757527	0.000985706	0.0105188	yes
SEC11C	18:56807086-56826068	0.75609	1.03046e-06	2.95578e-05	yes
ZFYVE20	3:15111386-15140729	0.754884	0.0029483	0.0255011	yes
HRAS	11:532241-537287	0.754793	0.000253043	0.00341116	yes
KIF3B	20:30865466-30922814	0.754328	2.54142e-07	8.73471e-06	yes
SLC39A7	6:33161364-33172216	0.754227	8.55269e-07	2.56413e-05	yes
MGST3	1:165600005-165631033	0.753216	2.31639e-05	0.000433187	yes
CD99	X:2609219-2659350	0.752888	3.63708e-06	8.78579e-05	yes
SHISA5	3:48488113-48542259	0.752612	0.000178812	0.00255494	yes
UVRAG	11:75514475-75855240	0.752175	0.00011889	0.00180165	yes
GSR	8:30535578-30585443	0.75196	0.000388802	0.00489935	yes
ANP32B	9:100745518-100780616	0.751095	6.54247e-07	2.01693e-05	yes
TMEM219	16:29952205-29984373	0.75109	9.44147e-05	0.00147017	yes
EDA2R	X:65814327-65859108	0.751071	0.00613162	0.0447482	yes
OCRL	X:128673825-128726551	0.750927	4.26755e-05	0.000738353	yes
ITPR3	6:33588521-33679504	0.750327	2.43057e-08	1.10388e-06	yes
DEF8	16:90014332-90034468	0.749602	0.00616847	0.0449098	yes
INF2	14:105155942-105189215	0.749366	3.36123e-05	0.000601317	yes
SAT2	17:7529551-7531194	0.74861	3.47842e-05	0.000620827	yes
ADCK2,NDUFB2	7:140218219-140624607	0.748563	0.00432287	0.0344475	yes
SMARCB1	22:24129149-24181315	0.747762	0.000137379	0.00203732	yes
DSG3	18:29027610-29058665	0.747471	1.31022e-07	4.94898e-06	yes
BLVRB	19:40953692-40971725	0.747291	5.5644e-06	0.000124922	yes
FAM115A	7:143548467-143599291	0.747112	0.000536186	0.00635757	yes
TGFBR1	9:101866319-101921656	0.746977	0.0022517	0.0205631	yes
STX8	17:8924858-9479895	0.746563	0.00186358	0.0176965	yes
AGTRAP	1:11796015-11814859	0.746249	0.00200856	0.0186553	yes
CLDN15,FIS1	7:100875372-100895946	0.745869	0.000242767	0.00329635	yes
CTGF	6:132269315-132398533	0.745193	2.78308e-08	1.23101e-06	yes
ZNF275	X:152599612-152625568	0.744611	0.00168488	0.0162653	yes
EML2	19:46112659-46148726	0.743198	0.00184164	0.0175318	yes
SDF4	1:1152285-1167525	0.743083	4.10473e-06	9.66638e-05	yes
	17:75277491-75496677	0.742627	5.12747e-07	1.64036e-05	yes
GABRR2,UBE2J1	6:89964264-90062567	0.742174	0.000206538	0.0028757	yes
DNAJC5	20:62526517-62567418	0.741371	6.05725e-08	2.44419e-06	yes
-	2:243170786-243173675	0.740744	0.00225011	0.0205608	yes
PRNP	20:4666881-4682240	0.740369	3.37534e-07	1.14208e-05	yes
AHCYL2	7:128864863-129070052	0.739861	0.00336915	0.0282698	yes
RP3-402G11.5.1	22:50639283-50700254	0.739691	0.00373127	0.0306124	yes
HIST1H4H	6:26277239-26286020	0.738919	0.00632793	0.045852	yes
FBXO16,ZNF395	8:28203101-28347835	0.73872	0.00506945	0.0387768	yes
ZBED4	22:50247489-50291228	0.738217	0.000142206	0.00209359	yes
ANAPC11	17:79849586-79860063	0.738175	0.000351175	0.00452995	yes
C9orf140	9:139952114-139965040	0.738161	0.00142394	0.0142382	yes
UBA1	X:47050259-47074605	0.738062	1.45474e-05	0.000288303	yes
RPS20	8:56979838-56987119	0.737803	3.44973e-08	1.4829e-06	yes
ZNF787	19:56598731-56632649	0.736525	1.39448e-06	3.84806e-05	yes
PIN1	19:9945931-9960365	0.735133	0.000207942	0.00288734	yes
ZNF319	16:58028571-58055522	0.734572	0.00591289	0.0434238	yes
NETO2	16:47111613-47177908	0.734554	0.000838989	0.0092307	yes
SNORA24	4:119199861-119200979	0.734288	0.000355326	0.00456333	yes
KLHL29	2:23608087-23931481	0.734091	0.00612138	0.0446995	yes
CSRNP1	3:39183345-39196053	0.733923	2.70513e-08	1.20351e-06	yes
RPL29	3:52027643-52029958	0.733631	9.35257e-09	4.64887e-07	yes
GPR153	1:6307405-6321035	0.733364	1.26941e-05	0.000256339	yes
HSPBAP1	3:122458841-122512671	0.733111	0.00102514	0.0108712	yes
TBCD	17:80709939-81009686	0.733053	0.00596611	0.0437706	yes
ZNF134,ZNF211	19:58125177-58154969	0.73291	0.00407579	0.0329257	yes
RPE65	1:68851612-68924260	0.732882	5.06364e-08	2.09407e-06	yes
CD97	19:14492003-14530204	0.73273	0.00060586	0.00703609	yes
CYB561	17:61509663-61523722	0.731612	2.16605e-05	0.000410097	yes
RPL10	X:153618314-153650065	0.73118	1.68655e-06	4.54713e-05	yes
RPL27A	11:8633583-8932498	0.731143	0.000585679	0.0068277	yes
ANXA2P2	9:33624222-33625532	0.730521	4.41022e-06	0.000102646	yes
PDIA6	2:10861774-10978103	0.730469	2.34322e-08	1.07059e-06	yes
ZDHHC18	1:27153200-27183391	0.730325	0.000367616	0.00468993	yes
KIDINS220	2:8865407-8977760	0.730311	2.17454e-05	0.000411196	yes
OTUD3	1:20208895-20239438	0.728706	0.000352225	0.00453965	yes
IRAK1,MECP2	X:153275950-153402578	0.728496	0.00227771	0.0207634	yes
AAGAB	15:67493370-67821467	0.728117	0.000248788	0.00336569	yes
TBCB	19:36602104-36617011	0.728044	0.00212519	0.019631	yes
FBLN1	22:45898117-45997074	0.727883	1.15708e-05	0.000235741	yes
ZDHHC7	16:85007786-85061229	0.727529	0.000354242	0.00455796	yes
TMEM109	11:60680637-60720002	0.727071	7.12627e-06	0.000155131	yes
TRAK1	3:42055293-42267381	0.726372	0.00219566	0.0201401	yes
KIAA1522	1:33207485-33240571	0.72584	3.46905e-06	8.42956e-05	yes
DBI	2:120124496-120130126	0.72566	1.33688e-08	6.49709e-07	yes
FXYD3	19:35606233-35634013	0.725223	4.90881e-06	0.000112984	yes
CCDC64	12:120427638-120532298	0.725006	0.00183497	0.0174901	yes
CBLB	3:105374304-105588396	0.724657	0.00196161	0.0183333	yes
SNHG13	4:53578383-53586998	0.724616	6.6643e-07	2.04622e-05	yes
ETHE1	19:44010869-44040282	0.724574	0.000455692	0.00555864	yes
ZNF146	19:36668428-36737159	0.724515	1.00941e-06	2.92845e-05	yes
MICALL1,POLR2F	22:38301663-38437113	0.72445	0.00703646	0.0498729	yes
C1orf198	1:230972864-231005335	0.723832	0.00267749	0.0236146	yes
HIST1H2AC	6:26113262-26139336	0.723615	4.11381e-05	0.000714186	yes
CYP4B1	1:47223509-47285085	0.723122	0.00389777	0.0316889	yes
PXK	3:58318606-58419584	0.722978	0.00128104	0.0130673	yes
ATP6V0A1	17:40610849-40674599	0.722117	9.03619e-07	2.67468e-05	yes
RPS3	11:75110529-75133324	0.718993	7.57704e-05	0.00121839	yes
NACA,PRIM1	12:57106208-57181574	0.717416	0.000132583	0.00197195	yes
RPL38	17:72199720-72209481	0.717286	1.06652e-05	0.000219045	yes
P4HB	17:79801034-79818545	0.717243	0.000478998	0.005792	yes
SLC35F2	11:107661653-107799019	0.716606	0.000208143	0.00288751	yes
RPS17	15:82821157-82824972	0.716064	4.3231e-08	1.83762e-06	yes
KRTCAP2,MUC1	1:155141883-155164539	0.715616	0.00706349	0.0499786	yes
CD81	11:2349978-2420945	0.715534	7.03273e-06	0.000153314	yes
ZNF227	19:44711988-44741730	0.714406	0.00458629	0.0360385	yes
TOB2	22:41829495-41843764	0.714349	3.99576e-05	0.000696861	yes
STK40	1:36805224-36851497	0.71368	4.11383e-05	0.000714186	yes
F3	1:94994780-95008959	0.713469	0.000276767	0.00369184	yes
SERTAD3	19:40946748-40950282	0.71339	0.00193343	0.0181394	yes
PRKAG2	7:151253209-151576299	0.713023	7.40154e-05	0.00119775	yes
CCNI	4:77968305-77997158	0.712359	9.41637e-07	2.76255e-05	yes
POGK	1:166808654-166825581	0.712322	3.66527e-05	0.000649228	yes
FIZ1	19:56102737-56111605	0.712166	0.00176566	0.0169459	yes
ACSL3	2:223725651-223809357	0.711481	0.0035999	0.0297519	yes
ATP5I	4:666224-683230	0.711178	7.44733e-06	0.000161429	yes
SLC39A13	11:47404698-47438047	0.711082	0.00429207	0.0342917	yes
SLC3A2	11:62623491-62656352	0.71065	0.00521636	0.0396028	yes
EEF2	19:3972315-3985461	0.710431	1.6496e-07	5.9793e-06	yes
TMED9	5:177019158-177025300	0.710326	3.77203e-07	1.25406e-05	yes
CORO2A,TBC1D2	9:100883256-101018601	0.708844	2.88337e-05	0.000525689	yes
IDH1	2:209100950-209130798	0.708221	2.29603e-05	0.000430965	yes
-	10:104402080-104403300	0.706832	0.00181901	0.0173706	yes
TNFRSF10B	8:22545066-22941132	0.706547	0.000263407	0.00353215	yes
TPM4	19:16178316-16213814	0.706232	8.65731e-07	2.5904e-05	yes
H1F0	22:38201097-38203442	0.7056	3.67962e-06	8.82877e-05	yes
RPL35A	3:197615945-197687013	0.705166	8.16984e-06	0.00017388	yes
TUBB2A	6:3153902-3157809	0.704623	0.00264482	0.0234106	yes
MEN1	11:64570981-64578766	0.70304	0.00108638	0.011449	yes
CCNG1	5:162864451-162875197	0.702961	0.000377939	0.00479016	yes
GNA13	17:63005406-63052920	0.70263	1.82458e-05	0.000351999	yes
YDJC	22:21982377-21984353	0.702163	0.000392726	0.00493251	yes
PRKCSH	19:11531272-11561783	0.70197	6.31837e-07	1.96772e-05	yes
DNAJB1	19:14625580-14640049	0.701475	4.45772e-08	1.88958e-06	yes
BAHCC1	17:79373539-79433358	0.700686	0.00246775	0.0222302	yes
CA11	19:49141229-49184461	0.70034	0.00113382	0.0118588	yes
CPNE7,RPL13	16:89626680-89663654	0.700151	1.1664e-05	0.000237323	yes
ATP5E	20:57594308-57607437	0.69991	5.51085e-06	0.000124218	yes
FAM108A1	19:1876808-1885500	0.699672	0.000188511	0.00266854	yes
RPL26	17:8280837-8287336	0.699172	2.59764e-08	1.16588e-06	yes
KDELR1	19:48885826-48894810	0.698897	7.0395e-08	2.7785e-06	yes
TRIM44	11:35684352-35832653	0.698515	0.00199697	0.0185815	yes
ARHGEF35	7:143883175-144077725	0.698262	0.000801871	0.00887928	yes
ZNF467	7:149461270-149470568	0.698056	0.00300628	0.0258747	yes
SIAH2	3:150458913-150481264	0.697954	2.16025e-06	5.65445e-05	yes
DNASE2	19:12986022-12992335	0.697765	2.21004e-06	5.765e-05	yes
COX7C	5:85913720-85916779	0.697279	1.83844e-05	0.000354225	yes
PIP5K1C	19:3630181-3700463	0.696326	0.000187709	0.00266211	yes
S100A9	1:153330248-153333503	0.696322	2.75904e-08	1.22392e-06	yes
FAM120A	9:96193730-96328397	0.695505	3.44632e-05	0.000615818	yes
GNPAT	1:231376952-231413719	0.695201	4.76232e-05	0.000808376	yes
TBK1,XPOT	12:64798129-64895896	0.694418	0.00431228	0.0343991	yes
SNX11	17:46184910-46205564	0.694091	0.00255039	0.0228123	yes
MAP3K9	14:71189242-71276251	0.693177	0.000334363	0.00433875	yes
MYEOV2	2:241065979-241076224	0.692719	0.000281371	0.00373367	yes
MIEN1	17:37885408-37887040	0.692595	0.000130488	0.00194838	yes
TNIP1	5:150409505-150473138	0.691541	0.000456361	0.00556236	yes
MED19	11:57470825-57479693	0.691454	0.00517933	0.0393608	yes
FOXP4	6:41462590-41570122	0.6913	1.37906e-05	0.000275813	yes
TOB1	17:48939581-48987098	0.690627	1.08028e-06	3.09288e-05	yes
MPST	22:37406899-37429588	0.690617	0.00117499	0.0121892	yes
PSME1	14:24605366-24610801	0.690562	1.01714e-06	2.93969e-05	yes
HMSD,SERPINB8	18:61616534-61672278	0.690533	0.00267383	0.0236146	yes
TBC1D20	20:413859-443197	0.690429	3.01978e-06	7.5221e-05	yes
ANKRD50	4:125585206-125633887	0.689937	0.000198592	0.00278797	yes
SLX1B,SULT1A4	16:29262828-29606395	0.689692	0.00704992	0.0499451	yes
GFPT1	2:69507666-69614394	0.688762	3.99975e-06	9.49242e-05	yes
ARID1B	6:157099062-157530475	0.688146	0.00271214	0.0238543	yes
PRDX6	1:173446404-173457946	0.688131	4.18874e-07	1.37168e-05	yes
SLC10A3	X:153715644-153719016	0.687784	0.00043358	0.00537484	yes
OBFC2B	12:56615798-56623638	0.687494	0.00120165	0.0124152	yes
SEPW1	19:48281658-48287944	0.686701	5.50801e-07	1.74382e-05	yes
EPAS1	2:46520805-46613839	0.686153	0.00338492	0.0283656	yes
CEBPG	19:33864608-33873591	0.685226	1.61497e-06	4.38514e-05	yes
COX6A1P2	6:37012606-37013177	0.685086	0.00035714	0.00457979	yes
DUSP7	3:52082934-52090566	0.684529	1.83804e-07	6.63085e-06	yes
DDA1	19:17420159-17453539	0.684092	8.184e-05	0.00130773	yes
ALG12	22:50293715-50323100	0.6832	0.00488342	0.0377704	yes
FOXO1	13:41129816-41240734	0.683063	3.46316e-06	8.42869e-05	yes
KAT2A	17:40265125-40275371	0.682587	0.000159649	0.00230268	yes
HSPA1A	6:31777395-31785723	0.682584	8.87261e-08	3.43645e-06	yes
FAM83E	19:49103230-49118344	0.681829	0.000118876	0.00180165	yes
MBOAT1	6:20100934-20294706	0.681409	0.00473357	0.0369137	yes
RPL3	22:39708886-39716394	0.681235	9.43178e-07	2.76255e-05	yes
AREGB	4:75418300-75514664	0.681154	0.000363587	0.00465074	yes
ACO2	22:41865067-41940610	0.680893	0.00486477	0.0376643	yes
ATF3	1:212738675-212794119	0.680788	0.002124	0.019631	yes
GPT2	16:46918289-46965209	0.680606	0.00327469	0.0277005	yes
ITPK1	14:93403258-93582665	0.680363	0.00288063	0.025019	yes
CCDC11,MBD1,MYO5B	18:47349155-47808442	0.679946	4.63201e-05	0.000792426	yes
KLF4	9:110247132-110252763	0.679573	3.36164e-07	1.13997e-05	yes
AXIN1	16:337438-402673	0.679312	0.000142271	0.00209359	yes
THOP1	19:2785505-2813588	0.678073	0.000760334	0.00850015	yes
SPSB1	1:9352938-9429591	0.677895	0.00660997	0.0474227	yes
ERAL1	17:27182019-27188085	0.676231	0.000124667	0.00187615	yes
C19orf63	19:50970046-50986607	0.67621	1.93866e-05	0.000370727	yes
DUSP22	6:292088-354924	0.675855	0.000375075	0.00476715	yes
RBM47	4:40425271-40632892	0.675436	2.61443e-06	6.68784e-05	yes
NMT1	17:43138501-43221749	0.67454	2.8975e-05	0.000527006	yes
CD320,NDUFA7	19:8367010-8386285	0.674442	0.00192147	0.0180775	yes
ELOF1	19:11663857-11670051	0.6739	5.34225e-06	0.000120774	yes
CYC1	8:145144736-145152428	0.673824	2.61641e-06	6.68784e-05	yes
EIF4EBP2	10:72164134-72188374	0.67377	6.53395e-08	2.61016e-06	yes
OCIAD1	4:48807228-48863834	0.673301	0.000435862	0.00539875	yes
TBC1D2B	15:78268383-78370066	0.67319	0.00272853	0.0239585	yes
LMO4	1:87794150-87812788	0.673021	0.00235111	0.0213306	yes
BSG	19:571309-583492	0.672642	3.42285e-07	1.15559e-05	yes
RPL12	9:130186660-130265780	0.672538	3.92521e-07	1.29614e-05	yes
PARP4	13:24982294-25171814	0.671979	6.25775e-06	0.000138396	yes
HMG20B	19:3572774-3579086	0.670864	0.00333412	0.0280203	yes
MLYCD,OSGIN1	16:83932730-83999937	0.670524	0.00330779	0.0278878	yes
NDUFA4	7:10971577-10979883	0.668719	0.000496318	0.00595894	yes
PINK1	1:20959947-21044510	0.66869	2.87756e-05	0.000525258	yes
UQCR10	22:30163161-30166917	0.668554	0.000405355	0.00505089	yes
ZNF317	19:9251055-9274270	0.668329	8.77157e-06	0.000185137	yes
DYNLL1	12:120899470-120936298	0.668308	0.000450695	0.00552863	yes
RPL15	3:23933150-24038169	0.668206	0.000773064	0.00859836	yes
C9orf89	9:95858428-95875565	0.667976	0.00332677	0.0280122	yes
DYRK1B,FBL	19:40303630-40337054	0.667502	7.42184e-05	0.00119849	yes
PRELID1	5:176727687-176744821	0.6672	0.000897461	0.00971984	yes
GNG11	7:93551010-93555831	0.667068	0.00362093	0.0299001	yes
ARMC7,SLC16A5	17:73084054-73127877	0.666997	0.000859545	0.00939588	yes
DGKZP1	13:44542559-44545335	0.666462	0.0030378	0.0260286	yes
GLB1,TMPPE	3:33038111-33138722	0.666454	0.000693881	0.00785719	yes
XRCC1	19:44047463-44079767	0.666325	0.00299794	0.0258175	yes
NACC1	19:13215715-13251963	0.666266	2.15377e-06	5.64718e-05	yes
NOP10	15:34633916-34635378	0.665947	4.14018e-06	9.73485e-05	yes
NFE2L1	17:46125685-46139286	0.665562	3.55379e-06	8.60808e-05	yes
UQCR11	19:1597153-1605483	0.665502	7.3486e-07	2.24729e-05	yes
CIDECP	3:10055931-10068049	0.665324	0.00382537	0.0312501	yes
RPL30	8:98881067-99105838	0.665161	8.2478e-07	2.48247e-05	yes
JUNB	19:12902309-12904124	0.664504	2.05882e-06	5.45444e-05	yes
MTHFD2	2:74425688-74570541	0.664485	0.00326694	0.027681	yes
RNF187	1:228673672-228683467	0.664407	0.00123423	0.012666	yes
FUT5,NDUFA11	19:5866181-5904025	0.663861	0.000767111	0.00856209	yes
PAPD7	5:6714717-6757161	0.663615	0.000674531	0.00770459	yes
TUBGCP2	10:135092210-135166187	0.66337	0.00364093	0.0300004	yes
TMEM184C	4:148538505-148605381	0.663282	0.00616142	0.0449075	yes
-	5:40895169-40900470	0.662639	0.00294137	0.0254886	yes
DCTN1	2:74588280-74621009	0.660719	4.03956e-05	0.000703694	yes
TNFAIP3	6:138178179-138204449	0.659013	0.00336978	0.0282698	yes
TSPAN14	10:82213921-82283092	0.658546	0.00303238	0.026024	yes
ATP6V1A	3:113437813-113530906	0.658504	0.00533878	0.0402122	yes
GAPDH	12:6641455-6665239	0.658491	1.8028e-05	0.000348237	yes
HOTAIRM1	7:27132611-27142430	0.658372	0.00354142	0.029416	yes
FAM83A	8:124191199-124222320	0.658081	0.000131736	0.00196318	yes
TMEM9	1:201103899-201140702	0.657049	0.00113072	0.0118346	yes
TRAF4	17:27071035-27077974	0.657048	0.00453833	0.0357743	yes
RPL7	8:74202505-74268696	0.656345	0.00097517	0.0104429	yes
TLE1	9:84198597-84304548	0.655637	0.00121552	0.0125246	yes
ANTXR1	2:69240309-69476459	0.655574	0.00180185	0.0172282	yes
SNRPD2	19:46190712-46195443	0.655037	1.76654e-06	4.73769e-05	yes
ZG16B	16:2880169-2882285	0.654753	0.000317224	0.00413393	yes
S100A11	1:151967006-152022348	0.654293	6.6554e-07	2.04622e-05	yes
BAG3	10:121410869-121484200	0.653823	1.40387e-05	0.000280407	yes
RPN2	20:35729628-35870027	0.652524	0.00687178	0.0488873	yes
HLA-B,HLA-C	6:31236523-31324965	0.65193	0.000112137	0.00171464	yes
RPL28	19:55895687-55919514	0.64989	0.000264779	0.00354744	yes
ZNF524	19:56111729-56114504	0.649603	0.00025331	0.00341175	yes
RPS23	5:81267843-81574396	0.64949	1.56923e-05	0.000307795	yes
RPS2	16:2012052-2019114	0.648644	5.67714e-06	0.000127028	yes
EDC4	16:67906917-67918417	0.6485	8.49698e-06	0.000179839	yes
CRTC2,SLC39A1	1:153920144-153958834	0.648499	0.00250392	0.0225161	yes
ATP6V1B2	8:20054877-20084330	0.648398	3.66733e-05	0.000649228	yes
MMD	17:53469973-53499341	0.64828	0.00212962	0.0196434	yes
LDLR	19:11199916-11244508	0.648123	0.000404198	0.00504944	yes
RPL24	3:101399934-101405626	0.647801	6.43854e-07	1.98891e-05	yes
SMARCA4	19:11071597-11172958	0.647469	0.0033963	0.0284454	yes
NDUFS4	5:52856462-52979168	0.647368	0.000250784	0.00338969	yes
DAD1	14:23033804-23058175	0.646833	2.28092e-05	0.000429185	yes
CXCL2	4:74962792-74965010	0.64601	0.000449962	0.00552852	yes
-	17:1954381-1958253	0.645777	0.00213039	0.0196434	yes
CPD	17:28705941-28796730	0.645776	7.70549e-06	0.000166552	yes
CDK3,TEN1	17:73937595-74002080	0.645558	0.00506323	0.0387768	yes
CREBBP	16:3775054-3930722	0.644875	1.01151e-06	2.92897e-05	yes
PRDX5	11:64073043-64090916	0.644317	0.00100782	0.0107248	yes
LY6K	8:143781159-143808391	0.643771	0.00508135	0.038841	yes
PTPRG	3:61546328-62355005	0.643607	0.000149235	0.00217481	yes
PIGG	4:492988-534147	0.643015	0.00381808	0.0312407	yes
ARHGEF5	7:143883175-144077725	0.642989	0.00156873	0.0154047	yes
NPC1	18:21083461-21166451	0.642511	2.80801e-06	7.08268e-05	yes
MAN2A1	5:109025066-109205326	0.642386	5.12179e-05	0.000862677	yes
NBL1	1:19967047-19986045	0.642105	0.000565091	0.0066384	yes
RPL4,SNAPC5	15:66679154-66858317	0.642059	0.00162438	0.0158087	yes
-	6:145244518-145251435	0.641687	4.57928e-05	0.000784285	yes
HOMER3	19:19010322-19052062	0.639882	0.000846702	0.00929545	yes
NEDD4L	18:55711618-56068772	0.639719	2.11255e-06	5.5678e-05	yes
SH3D19	4:152041394-152246703	0.639628	0.000667345	0.00763395	yes
PDIA4	7:148700145-148725894	0.63943	8.60112e-06	0.000181791	yes
TAOK2	16:29984961-30003582	0.639396	3.20822e-05	0.000577328	yes
LRPAP1	4:3508102-3534286	0.638398	0.000723889	0.00814642	yes
TJAP1	6:43445260-43474294	0.638102	0.00190309	0.0179574	yes
BOD1	5:173034516-173043663	0.638089	5.2876e-05	0.000883776	yes
TMEM184B	22:38615295-38669040	0.637946	0.0050109	0.0384446	yes
IER2	19:13254902-13265724	0.637852	4.04961e-05	0.000704642	yes
IER5L	9:131937834-131972827	0.637808	0.00525104	0.0397869	yes
RPL19	17:37355239-37360989	0.637117	4.07954e-07	1.34168e-05	yes
RGMB	5:98104353-98134347	0.63668	7.72182e-05	0.00123906	yes
BLVRA	7:43798150-43860796	0.636591	2.94489e-05	0.000534352	yes
LMNB2,TIMM13	19:2389768-2456994	0.635958	0.000524599	0.00624445	yes
GALNT2	1:230193535-230417870	0.635807	0.000190935	0.00269784	yes
MINOS1	1:19923476-19956314	0.635285	0.00524261	0.0397626	yes
IRF2BPL	14:77490887-77495034	0.634996	2.26015e-06	5.87563e-05	yes
MRPL22	5:154320629-154348971	0.633963	0.00409093	0.033013	yes
HNRNPA0	5:137085850-137090653	0.633403	5.75557e-07	1.79979e-05	yes
TP53INP2	20:33284721-33302432	0.633398	5.11978e-05	0.000862677	yes
FAM127A	X:134153136-134167929	0.63317	0.00328759	0.0277788	yes
WASF2	1:27730729-27816669	0.632263	2.0545e-05	0.000389947	yes
SMURF1	7:98475555-98741723	0.632217	0.00188296	0.0178251	yes
IFITM3	11:307630-321340	0.632114	0.00116932	0.0121551	yes
SUSD2	22:24577226-24585078	0.631365	6.56063e-05	0.00106733	yes
TPM3	1:154127783-154167124	0.631232	0.0016635	0.0161174	yes
SSNA1	9:140069235-140084822	0.631151	0.00251225	0.0225396	yes
RPS27A	2:55397338-55497336	0.631079	3.60048e-05	0.00063962	yes
DCTN3	9:34612174-34620515	0.630037	0.00437214	0.0347671	yes
TGFBR2	3:30647712-30735644	0.628767	1.58751e-06	4.3337e-05	yes
RAD54L2,TEX264	3:51572812-51738339	0.627349	0.000313434	0.00409153	yes
SCAMP2	15:75136068-75165706	0.627162	0.000112957	0.00172385	yes
GNS	12:65107221-65153227	0.626708	0.000148419	0.00216526	yes
RNF7	3:141456746-141466434	0.625581	0.00126324	0.0129029	yes
SLC25A6	X:1455508-1511786	0.625576	0.000201414	0.00281721	yes
TACO1	17:61678157-61685945	0.625316	0.00240147	0.0217357	yes
EHBP1L1,FAM89B,SSSCA1	11:65335952-65363467	0.62528	0.0048862	0.0377728	yes
CHRAC1	8:141521396-141529989	0.625084	0.00438119	0.0347851	yes
SIRT6	19:4174105-4182596	0.624768	0.0052722	0.0398878	yes
PSMD7	16:74330672-74403724	0.624388	0.00653759	0.0470583	yes
YARS	1:33240839-33324476	0.624008	0.00293126	0.0254153	yes
PSMC4	19:40476929-40488284	0.623214	8.12945e-06	0.000173504	yes
GTF2H5	6:158589383-158615020	0.623155	9.21703e-05	0.00144406	yes
DCAF7	17:61627807-61671639	0.622243	0.00104727	0.0110904	yes
DHCR24	1:55314137-55354523	0.6217	0.000146197	0.00214105	yes
C19orf42	19:16741574-16771879	0.621689	0.00144191	0.0143626	yes
KIAA0040	1:175126122-175162224	0.621553	4.41684e-05	0.00075902	yes
FAM165B	21:35747778-35780164	0.621196	0.00215858	0.0198673	yes
RPL8	8:146013906-146019644	0.619968	0.000103996	0.00160301	yes
RPLP1	15:69745122-69748255	0.619913	6.90585e-06	0.000151195	yes
ZNF318	6:43299512-43337181	0.619057	3.26526e-06	8.02593e-05	yes
TOLLIP	11:1295598-1330884	0.618966	0.00502335	0.0385207	yes
LEMD2,MLN	6:33738978-33771788	0.618661	0.00649352	0.0468073	yes
DRAP1	11:65686727-65689035	0.617384	0.00222417	0.0203726	yes
UBE2R2	9:33817341-33920402	0.617265	2.72796e-06	6.93812e-05	yes
TSSC4	11:2421717-2425159	0.617137	0.00146925	0.0146159	yes
PIGS	17:26880404-26898820	0.616978	0.00222612	0.0203782	yes
NUCKS1	1:205626978-205719475	0.616717	0.00366569	0.0301393	yes
PTPN1	20:49126890-49201299	0.616222	0.000612524	0.00709728	yes
DTX3L	3:122246708-122294192	0.616033	0.000220707	0.00303423	yes
CRB3	19:6460640-6481798	0.615738	0.00358321	0.0296689	yes
VDR	12:48234623-48336831	0.614736	3.10242e-05	0.000560271	yes
PEX11B	1:145516203-145524247	0.614558	0.000449371	0.0055257	yes
NBPF14	1:148003641-148025863	0.614024	0.00485232	0.0376252	yes
HM13	20:30102218-30161066	0.613668	0.0021882	0.0201035	yes
TMEM51	1:14925199-15547023	0.613562	0.000214433	0.00296131	yes
CAPG	2:85620691-85645555	0.613544	0.000217662	0.00300047	yes
GDI1	X:153665265-153671814	0.613445	0.00158798	0.0155437	yes
MYO10	5:16662056-16936385	0.612167	0.00489737	0.0378016	yes
CDKN2D	19:10677138-10679655	0.611694	0.00102487	0.0108712	yes
TPM2	9:35681976-35691017	0.611371	0.000515822	0.00615437	yes
FLOT1	6:30695485-30710533	0.611346	0.00113512	0.0118643	yes
RPS14	5:149822081-149829319	0.610905	0.000164245	0.00235784	yes
RPL13AP5	10:98510044-98510675	0.610838	1.10762e-05	0.000226268	yes
HLA-E	6:30457243-30461982	0.61076	5.18748e-06	0.000117877	yes
SLC7A1	13:30083529-30169721	0.610605	1.29598e-06	3.59576e-05	yes
RPL17	18:47014857-47018906	0.609454	1.46717e-05	0.000290389	yes
ABHD15	17:27886873-27894042	0.609265	0.00125288	0.0128229	yes
MSH6	2:48010220-48134949	0.608473	0.00552032	0.041153	yes
TICAM1	19:4815938-4831737	0.608038	5.27563e-05	0.000882743	yes
HADHA	2:26413503-26513366	0.608017	0.000724657	0.00814905	yes
ASS1	9:133320093-133376661	0.607611	0.00188752	0.0178572	yes
MPZL1	1:167689259-167761156	0.607087	0.00258114	0.0230072	yes
MTX2	2:177134122-177202753	0.60682	0.00514741	0.0391572	yes
MKKS	20:10385831-10414870	0.606334	1.28722e-05	0.000259248	yes
TATDN2	3:10287283-10334631	0.606285	0.00142606	0.0142382	yes
SPR	2:73114488-73119287	0.605847	2.3718e-05	0.000443006	yes
CPNE2	16:57126448-57181966	0.604902	0.0015321	0.0150838	yes
EPHA2	1:16450829-16493103	0.604865	0.0056082	0.0416048	yes
TRAPPC1	17:7833662-7835317	0.604697	0.000546654	0.00644663	yes
FAM50A	X:153672472-153679002	0.604363	0.000858288	0.00938887	yes
RPS23P8	X:70182813-70183140	0.604083	0.00442192	0.0350538	yes
SCAF1	19:50145381-50161905	0.60244	0.00280379	0.0244631	yes
EEF1A1P6	7:22459062-22705152	0.602409	1.57038e-06	4.29463e-05	yes
KLF16	19:1852153-1863564	0.601054	0.00408391	0.0329738	yes
ATP5B	12:57031958-57039798	0.599746	0.000795844	0.00881959	yes
EMP3	19:48828628-48833810	0.599626	2.50962e-06	6.44728e-05	yes
MSN	X:64887507-64961793	0.598733	3.28553e-06	8.06064e-05	yes
SYMPK	19:46318692-46366548	0.598729	0.00040461	0.00504944	yes
ADCY9	16:4012651-4166186	0.598618	0.00017458	0.00249915	yes
CLCF1,POLD4	11:67118247-67142201	0.598533	0.00280784	0.0244844	yes
FHOD3,MOCOS	18:33767480-34811481	0.598071	0.000384629	0.00485478	yes
GAA	17:78075330-78093682	0.598048	3.69946e-05	0.000654158	yes
CCDC104	2:55746739-55773015	0.595356	0.0050909	0.038863	yes
SEC13	3:10334814-10362862	0.594556	0.000293073	0.00385542	yes
C19orf10	19:4657565-4670415	0.594201	7.15425e-06	0.000155518	yes
PTGES	9:132500609-132539536	0.593468	6.95208e-06	0.000151946	yes
EXT2	11:44117098-44331716	0.592752	0.00670702	0.0480062	yes
RXRA	9:137208943-137332507	0.592671	0.000872767	0.00951316	yes
PRPS1	X:106871680-106894256	0.591404	0.00551898	0.041153	yes
HSP90AB1	6:44214823-44221620	0.591372	2.80771e-05	0.000514172	yes
ULK3	15:75128456-75135687	0.591051	0.0051079	0.0389411	yes
RPS12	6:133135579-133138703	0.589987	1.042e-05	0.000214878	yes
KLHL36	16:84682130-84701292	0.589981	0.00544817	0.0408145	yes
MGST1	12:16500075-16763528	0.588651	0.00012984	0.00194251	yes
RPL11	1:24018268-24022915	0.588247	2.89287e-06	7.26073e-05	yes
ATP5G3	2:176040985-176049335	0.587958	0.000151275	0.00219435	yes
TCOF1	5:149737201-149779870	0.586861	0.00388971	0.0316739	yes
PTMS	12:6857169-6880277	0.586522	0.0020492	0.0189981	yes
CAPNS1	19:36630472-36641736	0.586455	2.71747e-06	6.92298e-05	yes
PGD	1:10458648-10480233	0.585186	0.00157682	0.0154542	yes
RPL3P4	14:99439215-99439638	0.584843	0.000480254	0.0058026	yes
SFRP1	8:41119420-41167016	0.584739	9.22667e-06	0.00019314	yes
GOLM1	9:88556060-88715126	0.584123	0.00405426	0.0327691	yes
ODF3B,SCO2,TYMP	22:50946595-50978613	0.582786	0.00667849	0.0478244	yes
B3GNT3	19:17905854-17926991	0.581664	0.0013077	0.0132948	yes
RPS27	1:153963234-154127592	0.581399	4.3826e-06	0.000102417	yes
RPL14	3:40498782-40506549	0.580398	6.17403e-06	0.000136743	yes
C1orf210	1:43747545-43751288	0.579556	0.00197906	0.0184314	yes
PHLDA1	12:76419226-76427712	0.579228	0.00506511	0.0387768	yes
NAP1L1	12:76438669-76478813	0.579003	0.00337963	0.0283369	yes
SIGMAR1	9:34634718-34637935	0.578867	0.00430507	0.0343621	yes
TOMM7	7:22852250-22862470	0.578839	3.84551e-05	0.000674511	yes
B4GALT5	20:48249481-48330415	0.578644	2.86224e-06	7.20756e-05	yes
KXD1	19:18668571-18680197	0.578265	0.00260487	0.0231376	yes
PARK7	1:8014350-8045565	0.578105	0.000202583	0.00282838	yes
PEA15	1:160171988-160185167	0.575858	0.00142598	0.0142382	yes
RPL9P7	X:23851469-23957624	0.575588	0.00193845	0.0181589	yes
UROD	1:45477484-45481247	0.575421	0.00590073	0.0433952	yes
LSR	19:35738951-35758921	0.575077	9.30209e-05	0.00145476	yes
FLYWCH1	16:2961887-3001208	0.573484	1.36816e-05	0.000273991	yes
HMGN3	6:79910961-79944406	0.57323	0.00250769	0.0225367	yes
RBM19	12:114254542-114404182	0.572546	0.00311238	0.0265716	yes
TUSC3	8:15274723-15624158	0.571157	0.00492793	0.0379535	yes
COX6C	8:100025289-100906290	0.570623	0.000203911	0.00284432	yes
TTLL12	22:43560381-43583139	0.570527	0.00190518	0.0179574	yes
FBXL18	7:5470965-5553953	0.570208	0.00529025	0.0399649	yes
TMSB4X	X:12993226-12995346	0.569991	5.33416e-06	0.000120771	yes
RPS18	6:33213886-33244693	0.569701	3.14693e-05	0.000567639	yes
C6orf48	6:31802384-31807541	0.569116	0.000504687	0.00603568	yes
CTAGE4	7:143880547-143883173	0.567852	0.00589836	0.0433952	yes
TIPRL	1:168148095-168171351	0.567817	0.004023	0.0325682	yes
GGCT	7:30536234-30544460	0.567532	0.00336119	0.0282288	yes
RPS6	9:19375712-19380252	0.567485	0.000162848	0.0023444	yes
AP3D1	19:2100890-2151564	0.567296	1.43116e-05	0.000284369	yes
AP2A1	19:50270179-50320633	0.567122	5.44012e-05	0.000905302	yes
ACVR1,ACVR1C	2:158387153-158732374	0.565991	0.00105758	0.0111763	yes
TFE3	X:48886239-48901012	0.565745	0.00233937	0.0212367	yes
IRX1	5:3596167-3601517	0.564661	0.00137332	0.0138237	yes
SRF	6:43139036-43149243	0.563557	0.00440832	0.0349823	yes
RPL23A	17:27046410-27053950	0.563094	0.0001226	0.00184869	yes
GABARAPL1	12:10365056-10375727	0.562827	0.0020075	0.0186553	yes
ULK2	17:19674142-19771249	0.56257	0.00364481	0.0300161	yes
RABAC1	19:42460837-42463528	0.562437	8.53378e-05	0.0013467	yes
SCARB2	4:77079887-77135046	0.562162	0.000103186	0.00159374	yes
TPI1	12:6976282-7032861	0.562066	2.97206e-05	0.000538642	yes
CCDC72	3:48473573-48488060	0.561864	0.000279525	0.00371564	yes
SLC39A14	8:22224761-22291642	0.561599	2.29055e-05	0.000430465	yes
PPL	16:4853202-5069159	0.560913	0.00122662	0.0126048	yes
PIGT	20:44043926-44054884	0.560506	0.000139215	0.00205798	yes
AMZ2	17:66244144-66253305	0.560039	0.000745938	0.00835757	yes
NUPR1	16:28548605-28550980	0.55924	8.45682e-05	0.00133593	yes
SPATS2L	2:201170603-201343278	0.55918	0.00499823	0.038386	yes
SAA2,SAA4	11:18252895-18270190	0.559162	0.000317945	0.0041398	yes
GRPEL2	5:148724992-148737205	0.558925	0.00128364	0.013078	yes
MUL1	1:20825942-20834654	0.558099	1.69294e-05	0.000329099	yes
CAMTA2,SPAG7	17:4862519-4890972	0.5571	0.00437437	0.0347671	yes
HSPA13	21:15737587-15756537	0.555852	0.00390156	0.0317028	yes
RPL9P8	15:83023846-83108085	0.555493	0.000126118	0.00189239	yes
SLC6A6	3:14444050-14583588	0.555004	0.0038216	0.0312479	yes
SMG6	17:1963132-2207076	0.554875	0.00390405	0.0317061	yes
RNF135	17:29297241-29326929	0.554541	0.00193246	0.0181394	yes
RPS16	19:39923851-39926618	0.553958	9.13228e-06	0.000191427	yes
PPP1CA	11:67159175-67193078	0.553646	0.000473835	0.00574779	yes
RPL9P9	15:82647359-82748784	0.553645	2.11872e-05	0.000401635	yes
RPS19	19:42363669-42377484	0.553577	1.50672e-05	0.000296678	yes
LONP1	19:5674191-5720463	0.553228	0.00685465	0.0488032	yes
MYOF	10:95066185-95242074	0.551929	0.00498577	0.0383096	yes
ACBD6	1:180199420-180472284	0.551907	0.00671575	0.0480461	yes
SLC35C1	11:45825622-45834566	0.551691	0.00628155	0.0455591	yes
GAS5,SNORD44,SNORD47,SNORD74,SNORD76,SNORD77,SNORD79,SNORD80,SNORD81	1:173831289-173872397	0.551601	0.000491756	0.00590882	yes
COX5A	15:75211151-75230509	0.550374	0.00133367	0.0135049	yes
PALLD	4:169277885-169932090	0.550283	0.00412136	0.0331884	yes
TMEM11	17:21101262-21133348	0.54903	0.00152739	0.0150471	yes
KANK2	19:11274943-11308471	0.54837	0.000196977	0.00277038	yes
NAA60	16:3493681-3537200	0.547772	0.00280335	0.0244631	yes
ARF1	1:228270360-228286912	0.547268	0.0018935	0.0179026	yes
KCNS3	2:18059113-18542882	0.54701	0.00259017	0.023051	yes
B3GNT1	11:66112842-66115163	0.546567	0.000313818	0.00409304	yes
RNH1	11:494510-507300	0.546552	0.00189866	0.0179403	yes
BDP1	5:70751441-70874064	0.546133	0.00486161	0.037659	yes
RASSF5	1:206680661-206785904	0.545365	0.000213562	0.00295196	yes
RPS25	11:118868851-118901616	0.544953	0.000516606	0.00615891	yes
SEC24D	4:119643977-119759838	0.544742	0.00221923	0.0203396	yes
PDK4	7:95212810-95225828	0.544562	0.00360103	0.0297519	yes
RPS11	19:49999155-50002944	0.543703	1.67984e-05	0.000326968	yes
CNOT3	19:54641136-54676944	0.543421	0.00129386	0.0131717	yes
C12orf44	12:52463029-52502043	0.543079	0.00489537	0.0378016	yes
PPA1	10:71962586-71993667	0.542625	2.5825e-05	0.000476529	yes
AFG3L2	18:12328942-12377253	0.542328	0.000168985	0.0024236	yes
ENO1	1:8921056-8939953	0.541648	0.00323033	0.027447	yes
ARL3	10:104436314-104474164	0.541493	0.00311167	0.0265716	yes
GCC1	7:127220671-127242198	0.540568	0.00060955	0.00706818	yes
TRIM47	17:73870176-73875896	0.53918	7.48654e-05	0.00120638	yes
TIMP1	X:47420337-47479252	0.538585	0.000187054	0.00265529	yes
COX4I1	16:85810206-85840661	0.538235	0.000694606	0.00785719	yes
MFSD10	4:2932241-2936586	0.537731	0.0038589	0.0314903	yes
MFSD5	12:53644829-53648189	0.53715	0.00193519	0.0181394	yes
PPP1R15A	19:49375592-49379347	0.535205	6.23737e-05	0.00102457	yes
RPL37A	2:217250010-217443903	0.534333	0.00119747	0.0123803	yes
OBFC1	10:105616566-105678024	0.534015	0.00243566	0.0220191	yes
RPS4X	X:71401202-71527037	0.533331	0.000599302	0.00696523	yes
NEURL3	2:97163380-97173846	0.531476	0.00424442	0.0339821	yes
HNRNPL	19:39326890-39344948	0.531421	0.000136268	0.00202281	yes
EFNB2	13:107142092-107187462	0.530537	2.71815e-05	0.000500349	yes
SLC2A9,WDR1	4:9772776-10118608	0.530509	0.00441668	0.0350304	yes
CALU	7:128378228-128415844	0.530145	0.000228435	0.00312079	yes
LATS1	6:149979288-150040279	0.529554	0.00693394	0.0492378	yes
DUSP23	1:159750721-159752333	0.529494	0.00112079	0.0117548	yes
ATF4	22:39914534-39918981	0.529329	6.9557e-05	0.00113039	yes
LSM4	19:18417052-18434001	0.528747	0.000695724	0.00785843	yes
KCNIP3	2:95963051-96052565	0.527909	0.00259059	0.023051	yes
ERP29	12:112369101-112461255	0.527546	0.00106678	0.011258	yes
RPS9	19:54704456-54752862	0.52749	0.000150243	0.00218353	yes
SERTAD1	19:40927498-40931932	0.526845	0.000622521	0.00718322	yes
CALR	19:13049413-13055304	0.526842	2.81009e-05	0.000514172	yes
PRDM4	12:108126641-108155049	0.526795	0.00149771	0.0148409	yes
NPC2	14:74942894-75083350	0.526199	0.000497769	0.00597166	yes
HTATIP2,PRMT3	11:20385230-20535359	0.526192	0.0058847	0.04334	yes
TNIP2	4:2743374-2758103	0.52581	0.00444803	0.0352242	yes
RPS7	2:3617272-3628509	0.525375	0.00327721	0.0277065	yes
RPL39	X:118920466-118925606	0.525352	2.77401e-05	0.000509352	yes
C9orf69	9:139006387-139011094	0.525236	0.00456728	0.0359632	yes
RPL34	4:109541679-109553390	0.52505	8.4297e-05	0.00133441	yes
BNC1	15:83776158-84108197	0.524448	0.000176001	0.00251713	yes
C20orf4	20:34824380-34858840	0.523443	0.00118944	0.0123057	yes
VAV2	9:136627012-136857726	0.523195	0.00547113	0.0408861	yes
MED9	17:17380299-17396535	0.523032	0.00300947	0.0258876	yes
HSD17B10	X:53458205-53461320	0.522796	0.00141679	0.0142239	yes
CD9	12:6308880-6347427	0.522293	0.000207767	0.00288734	yes
COX7A2L	2:42560685-42652228	0.521454	0.00019237	0.00271561	yes
GSPT1	16:11961984-12010541	0.521232	0.000999819	0.0106471	yes
WDTC1	1:27561006-27635110	0.521155	0.00134963	0.0136213	yes
ATP5H	17:73032144-73043074	0.520523	0.000616839	0.00713644	yes
C2orf28,CAD	2:27422454-27466660	0.520311	0.0045278	0.0357292	yes
VDAC2	10:76969911-76995828	0.519488	0.000725522	0.00815278	yes
STEAP3	2:119981266-120024766	0.519012	0.000147327	0.00215346	yes
ABR	17:900113-1090616	0.518498	0.00243938	0.0220266	yes
G6PC3	17:42148097-42153711	0.517876	0.00679557	0.0485035	yes
SUCLG2	3:67410883-67705062	0.517458	0.00469479	0.0367021	yes
QSOX2	9:139098178-139137687	0.517396	0.00233396	0.0212127	yes
UBA52	19:18682613-18688269	0.514577	0.000102248	0.00158086	yes
RPL35	9:127615754-127624260	0.514255	6.54884e-05	0.00106655	yes
EFNA1	1:155099935-155107333	0.513039	0.00128381	0.013078	yes
DSCAML1,FXYD2,FXYD6	11:117298488-117748201	0.512501	0.00212759	0.0196413	yes
PRPF19	11:60658201-60674060	0.511841	0.000189681	0.00268261	yes
C9orf150	9:12685438-12834999	0.510873	0.00062965	0.00723529	yes
SLC35A4	5:139929751-139973337	0.51071	0.00186988	0.0177453	yes
INTS7	1:212113527-212280742	0.510028	0.0068461	0.0487956	yes
DYM	18:46566111-46987080	0.509556	0.00196586	0.0183368	yes
STK35	20:2082128-2157684	0.509401	0.00357763	0.0296388	yes
SEC11A	15:85212773-85259947	0.508753	0.00691384	0.0491408	yes
CTSF	11:66330932-66336312	0.508613	0.00656094	0.0471596	yes
EIF5A	17:7210317-7232881	0.508366	0.000694843	0.00785719	yes
LAMP2	X:119560006-119603220	0.508277	0.000938556	0.0100933	yes
SSR4	X:153051220-153063985	0.507458	0.00115677	0.0120411	yes
SLC26A2	5:149340299-149492991	0.507191	0.0013838	0.0139201	yes
CDR2L	17:72983726-73001895	0.506573	0.00149952	0.0148492	yes
SURF4	9:136218609-136242970	0.505953	0.00191249	0.0180041	yes
HBXIP	1:110943870-110961033	0.505912	0.000538515	0.00638023	yes
RPS19BP1	22:39925000-39928860	0.505853	0.000821435	0.00905061	yes
DDRGK1	20:3169374-3185466	0.504992	0.000945784	0.0101639	yes
WBP5	X:102611372-102613397	0.503658	0.00655889	0.0471596	yes
STK38	6:36461659-36515249	0.503336	0.0006875	0.00781338	yes
SLC44A1	9:108006902-108201452	0.502895	0.00409315	0.0330134	yes
PSENEN	19:36236493-36237903	0.501297	0.00118687	0.0122874	yes
CACNA2D2,TMEM115	3:50384760-50541675	0.500272	0.000629638	0.00723529	yes
SNRNP70	19:49588175-49611869	0.498863	0.00278806	0.0243815	yes
RGS16	1:182567757-182573543	0.498693	8.25743e-05	0.0013167	yes
S100A4	1:153516088-153522612	0.498551	0.00231413	0.0210576	yes
SGTA	19:2754711-2783354	0.498435	0.000163564	0.00235248	yes
KPNB1	17:45726841-45762854	0.497259	0.000491198	0.00590882	yes
UQCRH	1:46713359-46782449	0.496776	0.00542637	0.0406911	yes
CCM2	7:45039073-45116069	0.496277	0.00347927	0.0290765	yes
CHMP2A,MZF1,UBE2M	19:59062931-59111375	0.495858	0.0061657	0.0449098	yes
SPG21	15:65255361-65282648	0.495744	0.00554851	0.0413228	yes
ATRN	20:3451676-3631769	0.49533	0.00403844	0.0326585	yes
EXD3	9:140201347-140317714	0.49455	0.00363727	0.0299863	yes
EGLN2	19:41305047-41318399	0.494424	0.00087116	0.00950243	yes
PFN1	17:4848946-4860426	0.493975	0.000125931	0.00189239	yes
AIFM1	X:129259696-129299861	0.493806	0.00325222	0.0275869	yes
CERS2	1:150898738-150948010	0.493651	0.00343514	0.0287392	yes
KLF3	4:38614321-38703001	0.493291	0.000375151	0.00476715	yes
SNRPC	6:34725182-34741571	0.493074	0.00187429	0.017776	yes
IRF2BP1	19:46386865-46389376	0.492917	0.000390924	0.00492203	yes
SSRP1	11:57093076-57103351	0.492425	0.000199528	0.00279853	yes
COX5B	2:98262502-98265254	0.489746	0.000557108	0.00655472	yes
RPL37	5:40822168-40836668	0.487098	0.00253183	0.022693	yes
COX6A1,GATC,GATC.1	12:120875892-120899389	0.486624	0.000695098	0.00785719	yes
SLC30A1	1:211744909-211752084	0.485845	0.000360099	0.00460999	yes
KIAA0664	17:2592525-2615050	0.485619	0.00215173	0.0198161	yes
TRIM37	17:56833231-57232800	0.485321	0.00298782	0.0257448	yes
AGPAT2	9:139567457-139581875	0.483512	0.0049105	0.0378647	yes
RPS10	6:34385230-34393932	0.483273	0.000188082	0.00266493	yes
RPL13A	19:49990810-49996610	0.483174	0.00151194	0.0149335	yes
C20orf3	20:24943560-24973615	0.482266	0.000210247	0.00291141	yes
CASC3	17:38296506-38328431	0.482249	0.00354789	0.0294404	yes
ARHGEF1	19:42387250-42411597	0.4816	0.0015551	0.0152807	yes
TRIM41	5:180649445-180662809	0.481233	0.0016109	0.0157377	yes
LCAT,PSMB10,SLC12A4	16:67967468-68002597	0.479179	0.00351762	0.0292688	yes
CD70	19:6578869-6591860	0.477569	0.0010965	0.0115318	yes
RAB5B	12:56367696-56390455	0.477239	0.00663583	0.0475635	yes
MLLT1	19:6210392-6279959	0.476829	0.000255553	0.00343589	yes
RPL21	13:27825445-27830828	0.476097	0.000766636	0.00856209	yes
AHCY	20:32782374-32899608	0.474855	0.00452819	0.0357292	yes
MAPRE1	20:31407698-31442063	0.474681	0.000306831	0.0040191	yes
PIK3C2A,RPS13	11:17095935-17229682	0.474019	0.00326195	0.0276541	yes
ABHD8	19:17402940-17414282	0.473703	0.00646928	0.046743	yes
ETFB	19:51848409-51869672	0.473659	0.00483221	0.0375456	yes
COX6B1	19:36139124-36149686	0.472702	0.00036788	0.00468993	yes
TNPO3	7:128594253-128697573	0.472335	0.0040973	0.0330294	yes
RPS15	19:1438362-1440496	0.471829	0.000311702	0.00407589	yes
YBX1	1:43148084-43168023	0.470623	0.000391774	0.00492598	yes
PCGF2	17:36886509-36906969	0.470573	0.00389433	0.0316778	yes
C12orf62,orphan.1	12:50505761-50561288	0.468408	0.00391868	0.0317911	yes
FSCN1	7:5632438-5646286	0.468135	0.00493187	0.0379535	yes
SYNGR2	17:76164650-76169009	0.4674	0.00332806	0.0280122	yes
SMARCD2	17:61909440-61920351	0.467132	0.00144083	0.0143613	yes
NR1H2	19:50815193-50886266	0.465987	0.000580024	0.00677731	yes
TOP2A	17:38544767-38574408	0.465973	0.00495233	0.0380718	yes
SLC25A39	17:42376779-42405240	0.465654	0.00486035	0.037659	yes
GFOD2	16:67708435-67753324	0.465556	0.00208944	0.0193359	yes
GIPC1,PTGER1	19:14583277-14606944	0.465269	0.00112302	0.0117701	yes
AP1M1	19:16308664-16346160	0.464869	0.00588817	0.0433446	yes
FAM83G	17:18853988-18950439	0.463005	0.000929603	0.0100111	yes
PVR	19:45041044-45170785	0.462942	0.00330073	0.0278437	yes
WDR45L	17:80572436-80606411	0.462567	0.000857588	0.00938794	yes
TMEM38A	19:16771937-16800835	0.458541	0.00251244	0.0225396	yes
PSMB6	17:4699438-4701798	0.458478	0.000741114	0.00830963	yes
TRAPPC3	1:36602172-36615098	0.458184	0.00420827	0.0337413	yes
TECR	19:14640354-14676791	0.457326	0.000443155	0.00545807	yes
TTC13	1:231041987-231114621	0.456288	0.00366253	0.0301295	yes
HIST1H1C	6:26021906-26056724	0.455217	0.00706446	0.0499786	yes
C9orf47,S1PR3	9:91468065-91619925	0.454725	0.00492941	0.0379535	yes
ZBTB7A	19:4044698-4066816	0.453683	0.00172584	0.0166159	yes
RP2	X:46696374-46741793	0.45288	0.00133008	0.0134775	yes
CYP4X1	1:47427035-47517672	0.448377	0.00599302	0.0438836	yes
GNB2	7:100271153-100276797	0.447056	0.00426162	0.034084	yes
CLPTM1	19:45457847-45496601	0.445044	0.00179849	0.0172069	yes
KRT14	17:39738514-39743173	0.443947	0.000978711	0.0104661	yes
MOB3A	19:2070939-2096307	0.443388	0.0067888	0.0485005	yes
PTTG1IP	21:46269499-46293752	0.442936	0.00454095	0.0357743	yes
RPL27,RUNDC1	17:41102542-41154977	0.442899	0.00187933	0.0178017	yes
NDUFAB1	16:23592322-23607677	0.44241	0.00593584	0.0435695	yes
KANK1	9:213107-746105	0.44193	0.00170174	0.016415	yes
FAM168B	2:131805446-131851033	0.439178	0.00143315	0.0142941	yes
TUBB6	18:12305606-12327640	0.438269	0.00168478	0.0162653	yes
EPN1	19:56186560-56209311	0.437953	0.00271081	0.0238543	yes
AL161626.1	9:79186648-79186950	0.437772	0.00178614	0.0171316	yes
VAT1	17:41166583-41174459	0.437079	0.0012218	0.0125637	yes
TXN	9:113006090-113018920	0.433912	0.000622766	0.00718322	yes
PTBP1	19:797391-812327	0.433607	0.000714631	0.00805411	yes
CCDC124	19:18043823-18054793	0.430251	0.00223313	0.0204302	yes
ACTG1	17:79476998-79479827	0.429418	0.000633409	0.007273	yes
SLC19A2	1:169433146-169455241	0.428231	0.00363311	0.0299683	yes
ALCAM	3:105085405-105295757	0.427153	0.00513595	0.0391286	yes
WBP2	17:73841777-73851501	0.42597	0.00319442	0.0271571	yes
NDUFB7	19:14676891-14682886	0.425345	0.00692509	0.0491978	yes
CST3	20:23607379-23619110	0.419255	0.00142043	0.0142371	yes
PSMB5	14:23485751-23504439	0.418104	0.00428395	0.0342447	yes
HINT1	5:130494719-130541119	0.416532	0.00579804	0.0427637	yes
NOMO2	16:18511181-18573533	0.415612	0.00640498	0.0463442	yes
LINC00256A	9:115875352-115882208	0.414705	0.00165266	0.0160532	yes
GBF1	10:103973719-104142656	0.413633	0.00477163	0.0371127	yes
SSU72	1:1476483-1510249	0.412563	0.00196409	0.0183333	yes
BRK1	3:10157275-10168874	0.412013	0.00546054	0.040867	yes
UBL5	19:9938549-9940797	0.410442	0.00357162	0.0296051	yes
CXXC1	18:47808712-47814813	0.408435	0.00267735	0.0236146	yes
C19orf6	19:1000417-1021222	0.407681	0.00294715	0.0255011	yes
POM121	7:72349903-72425526	0.405935	0.00557955	0.0414729	yes
GPR87	3:150803483-151176497	0.405875	0.00184446	0.0175477	yes
SMG9	19:44235300-44259142	0.40489	0.00382306	0.0312479	yes
RPL21P28	7:19958603-20257027	0.404797	0.00540509	0.0405514	yes
ZFP36	19:39897486-39900045	0.404009	0.00150675	0.0148918	yes
-	8:100956207-100962303	0.403413	0.00231639	0.0210656	yes
CHMP4B	20:32399109-32442172	0.402749	0.00168515	0.0162653	yes
IER5	1:181055839-181062421	0.401912	0.00158931	0.0155467	yes
SARS	1:109756503-109790949	0.401441	0.00680434	0.0485207	yes
PRDX2	19:12907632-12912694	0.401267	0.00373446	0.0306222	yes
UPF1	19:18942743-18979041	0.398712	0.00268822	0.0236712	yes
PPP6R1	19:55741091-55770483	0.397633	0.00398393	0.0322861	yes
CTDNEP1	17:7146909-7155280	0.395162	0.00243858	0.0220266	yes
FKBP8	19:18642567-18654394	0.394106	0.00309432	0.0264534	yes
C5orf62	5:150157507-150176296	0.389757	0.00296058	0.0255679	yes
CIC	19:42772549-42799949	0.38045	0.00460741	0.0361672	yes
RAB3GAP1	2:135809834-136288806	0.37892	0.00579667	0.0427637	yes
LASP1	17:37026255-37078024	0.374493	0.00555139	0.041324	yes
KIF1C	17:4901242-4931696	0.365102	0.00351487	0.0292618	yes
ICAM1,ICAM4	19:10380349-10399231	0.361126	0.00573428	0.0424164	yes
GABARAP	17:7143332-7145772	0.358157	0.0048368	0.0375621	yes
NOMO3	16:16326451-16388668	0.33753	0.00678686	0.0485005	yes
TRIM28	19:59055835-59062082	0.336551	0.00583631	0.0430044	yes
UBL3	13:30338507-30424846	-0.367785	0.00461931	0.036242	yes
TNFRSF10D	8:22993100-23021543	-0.387023	0.00226176	0.0206426	yes
TNFSF9	19:6531009-6540204	-0.406928	0.0016702	0.0161619	yes
PPAP2B	1:56960418-57110974	-0.412121	0.00247626	0.0222805	yes
C8orf55	8:143808535-143818349	-0.420442	0.00359742	0.0297519	yes
RN7SK	6:52860417-52860748	-0.42195	0.00114443	0.0119371	yes
FAM3C2	X:23093874-23094884	-0.423169	0.0020053	0.0186477	yes
AK3	9:4711154-4742043	-0.424422	0.00647851	0.0467562	yes
PJA2	5:108670409-108745695	-0.427843	0.0017373	0.0166947	yes
ADO	10:64553321-64568238	-0.428487	0.00217591	0.0200026	yes
OTUD1	10:23728197-23731308	-0.429137	0.00217017	0.0199619	yes
C16orf72	16:9185536-9213536	-0.43186	0.000911423	0.00984312	yes
UTP3	4:71554195-71556267	-0.432221	0.00705748	0.0499755	yes
WASF1	6:110421021-110501211	-0.434139	0.00645679	0.0466748	yes
CHMP5	9:33264939-33281977	-0.447366	0.000953005	0.0102199	yes
USP1	1:62901920-62917475	-0.448764	0.00196974	0.0183618	yes
AQP3	9:33441151-33447609	-0.452289	0.00184036	0.0175305	yes
AIM1	6:106808704-107018431	-0.454549	0.00627336	0.045543	yes
LCN2	9:130911349-130915734	-0.457744	0.00102079	0.0108401	yes
DDX42	17:61851214-61896676	-0.462074	0.000627853	0.00723097	yes
CCDC6	10:61548518-61666778	-0.473093	0.000345545	0.00447245	yes
REEP3	10:65281122-65384883	-0.483905	0.000271273	0.00362489	yes
RANBP9	6:13615558-13711953	-0.484211	0.00166839	0.0161545	yes
FAM89A	1:231154703-231175992	-0.48475	0.00359105	0.0297177	yes
SLC7A2	8:17351840-17433331	-0.492408	0.000619088	0.00715703	yes
PTER	10:16478963-16555736	-0.497598	0.00267891	0.0236146	yes
ZBTB41	1:197122715-197170474	-0.499936	0.0051471	0.0391572	yes
RB1	13:48860302-49056122	-0.500055	0.00546668	0.0408815	yes
C7orf73	7:135347047-135433594	-0.508299	0.00508392	0.038841	yes
C18orf32	18:47006678-47013624	-0.508786	0.000908449	0.00981794	yes
PRRG4	11:32850591-32881649	-0.510049	0.000401274	0.00501922	yes
SYF2	1:25549169-25560187	-0.513072	0.000225337	0.00308398	yes
SCNN1G	16:23194035-23228204	-0.513956	0.000400014	0.00501076	yes
KHDRBS1	1:32479314-32568467	-0.515204	0.00267222	0.0236146	yes
DGKE	17:54869266-54946123	-0.517438	0.00267423	0.0236146	yes
PAIP1	5:43526368-43557860	-0.525278	0.00159819	0.0156236	yes
OR2AE1,TRIM4	7:99473609-99517756	-0.536555	0.00142091	0.0142371	yes
EID2	19:40028889-40030881	-0.540273	0.00134153	0.0135664	yes
HNRNPU	1:244998603-245027884	-0.540287	0.0015022	0.0148662	yes
USP12	13:27640292-27746033	-0.540818	4.28983e-05	0.00074053	yes
TMEM5	12:63952692-64217675	-0.544429	0.00531486	0.0400715	yes
ADK	10:75910959-76510368	-0.544812	0.000748615	0.00838141	yes
PIK3C3	18:39535170-39667794	-0.546164	0.00276845	0.0242657	yes
HNRNPA1L2	13:53191105-53217919	-0.546758	0.00313054	0.0266883	yes
TRAPPC8	18:29409135-29523239	-0.547416	0.000502349	0.00601243	yes
C16orf87	16:46830518-46865323	-0.553719	0.0013394	0.0135539	yes
ETNK2	1:204100187-204121307	-0.556762	0.00394801	0.032012	yes
ZNF629	16:30789586-30798523	-0.557097	0.00246114	0.0221968	yes
SPIN4	X:62563095-63005426	-0.559206	0.000379965	0.00480387	yes
CNO	4:6717841-6719387	-0.560221	0.00290253	0.0251949	yes
FBXW7	4:153236838-153456965	-0.563932	0.000286858	0.00378672	yes
HNRPDL	4:83343716-83382244	-0.569188	0.00118606	0.0122873	yes
TPTEP1	22:17082739-17185367	-0.571789	0.00132006	0.013393	yes
SLC30A9	4:41991985-42089551	-0.574593	0.0020443	0.0189642	yes
TBX3	12:115108058-115122280	-0.57616	0.00545499	0.0408455	yes
ST6GAL1	3:186648273-186796341	-0.578228	0.0047316	0.0369137	yes
DDX52	17:35969783-36003522	-0.581056	0.00259859	0.0230952	yes
CDKN2AIP	4:184364443-184370192	-0.586994	0.000791707	0.00878012	yes
CDC73	1:193082646-193223936	-0.587056	0.00485106	0.0376252	yes
HLA-Z	6:32861952-32871604	-0.590289	0.00045328	0.00553807	yes
AGGF1	5:76325075-76462734	-0.604386	0.00142538	0.0142382	yes
PHF6	X:133507166-133562820	-0.610109	0.000808181	0.00893684	yes
KLHL15	X:24001836-24045303	-0.629262	7.41988e-05	0.00119849	yes
FAM199X	X:103411300-103440583	-0.631328	0.000749834	0.0083889	yes
CLK4	5:178029639-178057616	-0.631819	0.00602972	0.0441312	yes
MALAT1	11:65264852-65273981	-0.635581	0.00547582	0.0409011	yes
PALB2	16:23614409-23652631	-0.636554	0.000652828	0.0074791	yes
ANKRD13A	12:110436990-110511491	-0.637331	0.00489631	0.0378016	yes
TIMP3	22:32908538-33454358	-0.638193	0.000459292	0.00559361	yes
PMS2CL	7:6749758-6793736	-0.640177	0.00306957	0.0262712	yes
CISD1	10:60028310-60049346	-0.643032	0.00243131	0.0219928	yes
VPS4B	18:61056422-61089724	-0.64419	5.94439e-06	0.00013204	yes
PARD6B	20:49348080-49373332	-0.649956	0.00350605	0.0292202	yes
ARL5A	2:152645497-152685009	-0.650107	0.00231016	0.0210341	yes
PAQR8	6:52226218-52281765	-0.650746	0.00657191	0.047194	yes
SPAST	2:32288664-32382706	-0.658324	0.00023537	0.00320406	yes
-	X:4458408-4464221	-0.660032	5.30547e-07	1.69022e-05	yes
SMYD4	17:1665252-1733170	-0.662849	0.00373674	0.0306244	yes
LIN7C	11:27516025-27528320	-0.666495	0.000180768	0.00257085	yes
IPMK	10:59951181-60027694	-0.667649	5.00236e-06	0.000114791	yes
GLUL	1:182350838-182361341	-0.675827	0.00539378	0.040508	yes
-	1:235187132-235191449	-0.676361	0.00247047	0.0222415	yes
FAM40A	1:110574198-110617263	-0.678689	0.00436222	0.0347115	yes
BAG4	8:37962759-38071026	-0.680174	0.00349759	0.0291816	yes
SCOC	4:141178439-141303718	-0.684692	3.80745e-05	0.000668605	yes
-	14:103811376-103817620	-0.685322	0.00620091	0.0451029	yes
ZNF436	1:23682713-23698332	-0.685601	0.000567063	0.00665536	yes
TRUB1	10:116697951-116737434	-0.685674	0.00262199	0.023249	yes
SMARCAD1	4:95128761-95212443	-0.69081	0.000210641	0.00291422	yes
-	2:62505114-62509817	-0.691306	0.00154752	0.0152257	yes
-	18:12884425-12889319	-0.693811	0.00662533	0.0475106	yes
RGMA	15:93586635-93632433	-0.695858	0.00465044	0.0363959	yes
FAM109A	12:111798338-111806925	-0.696715	0.000319854	0.0041611	yes
-	9:140022906-140024323	-0.703185	0.00365609	0.0300927	yes
EFHA1	13:22063814-22178353	-0.708209	0.00277248	0.0242871	yes
ZFP161	18:5289017-5296039	-0.72209	0.000623505	0.00718632	yes
TWISTNB	7:19735084-19748710	-0.723356	5.04268e-06	0.000115542	yes
GPATCH2	1:217600333-217804424	-0.725048	8.22846e-05	0.00131345	yes
MRPL45	17:36452989-36479101	-0.730881	7.72809e-06	0.000166804	yes
BLID	11:121899062-122017448	-0.731761	0.00636852	0.0461023	yes
RPS26	12:56435636-56438116	-0.738968	3.45605e-06	8.42482e-05	yes
TESK2	1:45794775-45956872	-0.741116	0.00319337	0.0271571	yes
MZT1	13:73282494-73301825	-0.741211	1.7939e-06	4.79421e-05	yes
ZMYM5	13:20392260-20437789	-0.74189	0.00170529	0.0164389	yes
ANKRD46	8:101521979-101572012	-0.742275	0.00648016	0.0467562	yes
RANBP6	9:6010947-6015639	-0.748923	0.000791695	0.00878012	yes
PDK3	X:24483337-24568583	-0.758394	0.00140853	0.0141502	yes
PPP1R3D	20:58508818-58609066	-0.758507	0.00526736	0.039871	yes
SCNN1B	16:23289551-23392620	-0.761055	0.00173249	0.0166695	yes
NFXL1	4:47849256-48042188	-0.761254	0.00448513	0.0354627	yes
NUFIP1	13:45513383-45563618	-0.761523	0.000718972	0.00809706	yes
SERPINB1	6:2832562-2842240	-0.761795	0.0069711	0.0494786	yes
IDI1	10:1034330-1178237	-0.762272	0.000686143	0.00780801	yes
NPY1R	4:164245112-164273086	-0.763204	0.000680922	0.00776017	yes
RERG	12:15260716-15750333	-0.76558	3.55491e-05	0.000632259	yes
NAPB	20:23342786-23402125	-0.770309	0.00193429	0.0181394	yes
PGM2L1	11:74041362-74380369	-0.772683	0.00256082	0.022866	yes
SHISA2	13:26618734-26625198	-0.774191	5.95867e-06	0.000132165	yes
U2SURP	3:142682899-142779567	-0.775114	0.00259684	0.0230931	yes
TCERG1	5:145825496-145891524	-0.78075	0.00205397	0.0190307	yes
ZBTB26,ZBTB6	9:125670334-125693779	-0.785491	8.34509e-05	0.00132514	yes
C19orf47	19:40826633-40854421	-0.785786	0.00064608	0.00740735	yes
DGKH	13:42614175-42830714	-0.788824	0.000135495	0.0020133	yes
SCYL3	1:169631244-169863408	-0.790817	0.000146506	0.00214352	yes
ZNF639	3:179040778-179053323	-0.799019	0.000245899	0.00333152	yes
ZNF189	9:104161067-104175434	-0.802269	1.88737e-05	0.000362736	yes
EPM2AIP1	3:37017806-37034795	-0.80449	0.0012318	0.0126496	yes
SAT1	X:23801289-23804343	-0.804529	1.95318e-07	6.94769e-06	yes
C4orf32	4:113066552-113116338	-0.807308	1.28678e-06	3.57674e-05	yes
FAM210A	18:13663345-13726591	-0.807742	1.26993e-06	3.5428e-05	yes
RG9MTD1	3:101280705-101285290	-0.815378	4.22275e-06	9.89849e-05	yes
VRK2	2:58134785-58468588	-0.815497	6.37844e-05	0.00104213	yes
PI3	20:43803516-43805185	-0.815626	8.31518e-09	4.174e-07	yes
RAPGEF5	7:22134817-22396763	-0.816071	0.00058051	0.0067778	yes
KIAA0020	9:2717238-2844241	-0.826928	0.000186086	0.00264402	yes
EDNRB	13:78424848-78550066	-0.829382	0.00303405	0.026024	yes
LAMP3	3:182840000-182881627	-0.838182	4.47705e-06	0.000103988	yes
ZNF326	1:90457721-90495373	-0.842058	3.65019e-06	8.78579e-05	yes
LIG4	13:108859793-108886603	-0.842687	5.64058e-06	0.000126395	yes
-	8:61047846-61050839	-0.845246	0.00333452	0.0280203	yes
MAOA	X:43463865-43606068	-0.847212	0.000144674	0.00212077	yes
REPS2	X:16964813-17171412	-0.857851	0.000731061	0.00820897	yes
ZNF25	10:38238499-38265561	-0.864688	0.000349568	0.00451685	yes
IL27RA	19:14142261-14164035	-0.865024	3.26612e-06	8.02594e-05	yes
MTR	1:236958211-237164828	-0.865586	0.000385018	0.00485568	yes
RNF152	18:59475295-59561632	-0.867605	1.41466e-07	5.27529e-06	yes
FGFBP1	4:15937191-15940363	-0.868867	4.17699e-11	3.50225e-09	yes
RPS26P6	8:101905478-101916540	-0.873428	0.0002792	0.00371455	yes
UBE2B	5:133706869-133727683	-0.876375	4.69652e-05	0.000800237	yes
ZC3H13	13:46528599-46627059	-0.876516	0.00329596	0.0278342	yes
PIGM	1:159968516-160003676	-0.878543	0.000222034	0.00304697	yes
ZNF655	7:99143930-99208439	-0.880138	0.00634863	0.0459801	yes
FAM133B	7:92190106-92219708	-0.892169	2.87466e-06	7.2269e-05	yes
ARID4A	14:58765102-58862359	-0.892392	0.000709762	0.00801107	yes
-	13:110439443-110441219	-0.894809	0.00187599	0.0177811	yes
COG2	1:230754705-230829730	-0.895851	1.57692e-07	5.79852e-06	yes
COX10-AS1	17:13927801-14121553	-0.89827	0.000440932	0.0054423	yes
-	1:8958993-8960135	-0.901217	1.16203e-06	3.27774e-05	yes
FAM3C	7:120988904-121036418	-0.903658	9.06167e-07	2.67468e-05	yes
B3GALT4	6:33244916-33246602	-0.908926	0.000285946	0.00377795	yes
CEP19	3:196366556-196462985	-0.916546	1.19972e-06	3.37782e-05	yes
BDNF	11:27528384-27899195	-0.927124	5.75778e-06	0.000128347	yes
UBE2D1	10:60094734-60130220	-0.929552	5.15233e-08	2.12499e-06	yes
TNFRSF11B	8:119935795-119964439	-0.936776	0.000229369	0.00313074	yes
CA8	8:61099905-61193993	-0.936952	4.6496e-07	1.50324e-05	yes
-	X:81373426-81384986	-0.940304	4.97236e-06	0.000114274	yes
SLC9A11	1:173468134-173644582	-0.942016	0.00532138	0.0401009	yes
TMEM128	4:4237268-4250435	-0.957589	0.00064383	0.00738711	yes
SRSF6	20:42086315-42092388	-0.968422	1.87861e-10	1.3459e-08	yes
CEP76	18:12658204-12725739	-0.972326	0.00131928	0.013393	yes
CHPT1	12:102090724-102224716	-0.980534	4.3904e-06	0.000102443	yes
ZC3H7A	16:11844441-11891099	-0.98174	2.18401e-11	1.93767e-09	yes
-	18:72258968-72261335	-0.987397	3.48449e-07	1.17122e-05	yes
DIMT1	5:61601988-61924489	-0.988584	0.00197963	0.0184314	yes
ORC5	7:103766787-103848495	-0.98977	5.16766e-06	0.000117877	yes
LYPD1	2:133174146-133429152	-0.990704	0.00506881	0.0387768	yes
-	X:4812562-4812921	-0.990825	2.88492e-09	1.60087e-07	yes
SPATA5	4:123844228-124235809	-0.992839	0.00011019	0.00169166	yes
HS3ST3A1	17:13396004-13505244	-1.00136	8.74248e-07	2.61077e-05	yes
-	10:60053302-60056498	-1.00763	0.00178725	0.0171316	yes
KIF18A	11:28042166-28355066	-1.01224	0.00280334	0.0244631	yes
FGFR3	4:1795033-1811187	-1.01655	0.00132087	0.013393	yes
DPY19L3	19:32896654-32976795	-1.0237	0.000452474	0.00553636	yes
THNSL1	10:25305586-25315593	-1.02812	0.00680039	0.0485152	yes
CTC1	17:8128034-8151413	-1.03036	9.93171e-05	0.00154179	yes
AGPAT5	8:6565877-6618998	-1.03404	7.3305e-07	2.24625e-05	yes
-	6:166756137-166765353	-1.03664	0.00011377	0.00173266	yes
SYDE1	19:15218213-15236598	-1.03801	0.00265387	0.0234771	yes
HSD17B2	16:82068608-82173236	-1.03892	4.2988e-05	0.00074124	yes
-	18:13183821-13188927	-1.04351	0.00508547	0.038841	yes
-	16:2827369-2830767	-1.04607	3.57632e-07	1.19681e-05	yes
HSD17B7	1:162760224-162783843	-1.04669	0.00120942	0.0124869	yes
AGTPBP1	9:88161454-88356944	-1.04909	3.67527e-06	8.82877e-05	yes
-	5:149022936-149028255	-1.05039	0.000342481	0.00443655	yes
TMEM47	X:34645180-34675405	-1.05132	3.64282e-06	8.78579e-05	yes
CLIC3	9:139889086-139891255	-1.05872	3.88908e-05	0.000679031	yes
-	18:8653861-8661380	-1.06163	7.5719e-06	0.000163897	yes
LGALS7B	19:39279824-39284249	-1.06193	1.89509e-09	1.08718e-07	yes
VRK1	14:97263640-97411731	-1.06516	0.00219614	0.0201401	yes
PRODH	22:18892250-18924066	-1.06896	0.00103047	0.0109201	yes
-	6:160090081-160093300	-1.07171	4.67514e-06	0.000108259	yes
ANKRD18EP	6:39071839-39083420	-1.07375	0.0020865	0.0193204	yes
PDE1C	7:31790792-32338941	-1.0808	0.00158564	0.0155307	yes
ABCD2	12:39943834-40013553	-1.08573	0.00201206	0.0186764	yes
AGXT2L1	4:109663195-109684213	-1.08678	0.00274265	0.0240533	yes
-	1:221916603-221920041	-1.09003	0.0048773	0.0377422	yes
ZBED3	5:76325075-76462734	-1.12108	7.08487e-05	0.00115016	yes
LRRK2	12:40579810-40763087	-1.12484	2.1496e-07	7.59327e-06	yes
CEP112	17:63631655-64188194	-1.12584	0.00312997	0.0266883	yes
-	8:61082167-61090288	-1.12594	1.72578e-05	0.000335056	yes
F2R	5:75699073-76031606	-1.13357	3.06422e-14	4.2899e-12	yes
-	1:68934011-68935037	-1.13625	0.00246768	0.0222302	yes
LCMT2	15:43619973-43646518	-1.17171	1.658e-05	0.000323544	yes
ALPP,ALPPL2	2:233243243-233275424	-1.1745	1.27969e-09	7.59848e-08	yes
SERPINI1	3:167453030-167543356	-1.1777	8.25284e-10	5.01746e-08	yes
RARB	3:25215822-25639424	-1.18018	3.35443e-12	3.50607e-10	yes
-	17:80292208-80294550	-1.18032	8.55492e-05	0.00134864	yes
FAM188A	10:15820168-15902519	-1.18168	0.0001435	0.00210559	yes
ZNF280C	X:129336575-129402873	-1.19442	0.00413917	0.0332791	yes
ADSS	1:244515936-244615436	-1.20474	1.65164e-10	1.21173e-08	yes
-	11:63940930-63943767	-1.22219	0.000980903	0.0104816	yes
DBNL	7:44083490-44111053	-1.22221	0.000113048	0.00172385	yes
-	1:227506397-227507923	-1.23511	0.003811	0.0311995	yes
CD74	5:149781199-149792492	-1.24357	0.000101914	0.00157729	yes
-	5:114910845-114913897	-1.25307	0.0030241	0.0259841	yes
SMAD1	4:146402345-146480670	-1.25606	2.09075e-08	9.7271e-07	yes
C9orf64	9:86553225-86571901	-1.25919	0.00630154	0.0456824	yes
GJA3	13:20712393-20735188	-1.25976	0.000878073	0.00955734	yes
C5orf55	5:439691-443264	-1.261	0.00460721	0.0361672	yes
FILIP1L	3:99536576-99897459	-1.26177	0.00656523	0.0471682	yes
EID2B	19:40021320-40023494	-1.27909	0.0014236	0.0142382	yes
C1orf115	1:220863186-220872499	-1.28099	2.33366e-06	6.04613e-05	yes
-	19:52185998-52192338	-1.28105	1.37067e-07	5.13915e-06	yes
-	17:41399936-41401367	-1.29425	4.2157e-09	2.28126e-07	yes
C17orf53	17:42219257-42239852	-1.29521	0.00210422	0.0194608	yes
-	19:23487921-23492046	-1.3012	0.00150432	0.0148774	yes
-	7:99645028-99647071	-1.34325	0.00115247	0.0120128	yes
CRHR2	7:30692199-30965131	-1.35006	0.00432269	0.0344475	yes
-	20:61204005-61209072	-1.35254	0.00045374	0.00553926	yes
-	7:2489933-2492120	-1.3532	0.00174002	0.0167103	yes
YAE1D1	7:39605920-39649919	-1.35638	6.7791e-06	0.000148634	yes
ZNF396	18:32943077-32957301	-1.35798	0.00307607	0.0263121	yes
-	18:12945757-12947712	-1.36359	9.02646e-07	2.67468e-05	yes
CTH	1:70876611-70912048	-1.38386	0.00151895	0.0149777	yes
-	2:57420542-57425780	-1.39063	1.00431e-11	9.40229e-10	yes
-	16:30645841-30646932	-1.40034	0.0064081	0.0463448	yes
-	3:141346920-141349953	-1.40234	0.000139311	0.00205798	yes
-	9:45352972-45356348	-1.43364	0.00194041	0.0181661	yes
-	4:153457432-153460381	-1.43715	0.000355557	0.00456333	yes
CDO1	5:115140429-115152651	-1.44144	5.17902e-06	0.000117877	yes
-	20:43868080-43875629	-1.44217	0.000205596	0.0028652	yes
-	18:9912325-9913849	-1.44222	0.000149358	0.00217481	yes
LINC00324	17:8123959-8127361	-1.44891	1.55362e-07	5.72662e-06	yes
-	1:161394025-161395731	-1.45087	0.00348216	0.0290847	yes
ITGA9	3:37493605-37903271	-1.45298	0.00546783	0.0408815	yes
ATAD5	17:29158987-29222384	-1.45644	0.00420787	0.0337413	yes
ALOX15P2	9:95675437-95685604	-1.45702	3.76366e-05	0.000662439	yes
MAP1LC3B2	12:116997185-117014425	-1.46944	2.88658e-15	4.73647e-13	yes
-	10:128588057-128593860	-1.46987	0.000854839	0.00936456	yes
FRMD3	9:85857904-86198871	-1.47773	0.00419137	0.0336634	yes
PTGS1	9:125132629-125158063	-1.49416	0.000126101	0.00189239	yes
HRSP12	8:99114571-99129469	-1.501	1.94302e-05	0.000371094	yes
-	3:33820264-33822426	-1.50535	0.00124292	0.0127466	yes
-	4:8363189-8366085	-1.52058	0.00318053	0.0270842	yes
CHN1	2:175664090-175870097	-1.52206	0.000575091	0.00672998	yes
-	4:88917660-88920529	-1.54558	0.00135993	0.0137161	yes
PGBD4	15:34394273-34396591	-1.54819	0.000106404	0.00163847	yes
PPP4R4	14:94612464-94746072	-1.55531	3.50771e-05	0.000624593	yes
-	17:60701942-60704538	-1.57692	0.00014081	0.0020761	yes
VRK2	2:58134785-58468588	-1.57753	5.18154e-06	0.000117877	yes
-	19:21374170-21375028	-1.59391	0.00563432	0.0417377	yes
-	19:46560975-46580935	-1.60384	0.00106335	0.0112295	yes
-	19:5548943-5553183	-1.61443	1.48963e-08	7.21645e-07	yes
BEST2	19:12861437-12869272	-1.6267	2.94269e-05	0.000534352	yes
-	6:160093383-160095994	-1.64602	1.90363e-06	5.06969e-05	yes
-	11:63944272-63947812	-1.64974	6.2989e-05	0.00103245	yes
HS6ST3	13:96743092-97491793	-1.65442	9.99201e-15	1.48037e-12	yes
-	4:83336464-83339810	-1.65612	0.00474893	0.0369927	yes
-	17:60550725-60553548	-1.67596	0.00305293	0.0261435	yes
-	19:46773602-46781793	-1.6774	0.00134929	0.0136213	yes
-	4:49314797-49328629	-1.68553	8.98117e-08	3.46969e-06	yes
-	1:244996988-244998528	-1.68969	0.000280818	0.00372957	yes
FAM151B	5:79703768-79842755	-1.69295	1.31937e-09	7.80374e-08	yes
-	14:35789480-35792247	-1.69964	0.000672749	0.00769	yes
-	1:115055195-115058273	-1.70272	0.002242	0.020499	yes
SPERT	13:46199378-46288699	-1.71376	0.00413269	0.0332445	yes
-	14:102416378-102418839	-1.73837	0.00095069	0.0102094	yes
-	20:61847769-61849918	-1.75157	0.000438405	0.00542144	yes
RHOU	1:228744884-228882416	-1.75531	1.55431e-15	2.63542e-13	yes
-	9:85316527-85319197	-1.78187	0.000277828	0.00369952	yes
-	7:128165590-128168381	-1.80745	0.000829598	0.00913395	yes
-	10:88289845-88291937	-1.8518	0.00591026	0.0434238	yes
-	9:108005077-108006797	-1.85381	0.00165619	0.0160773	yes
-	9:115098470-115100787	-1.85563	0.00341363	0.0285748	yes
KCNT2	1:196194908-196577541	-1.88691	0.000355541	0.00456333	yes
KLRG1	12:9102639-9163908	-1.89866	0.000534565	0.00634328	yes
KCNE2	21:35735184-35747647	-1.90696	4.23513e-07	1.3839e-05	yes
-	14:35792422-35795610	-1.91108	1.48339e-05	0.000293062	yes
-	3:33822833-33825085	-1.91354	0.000377619	0.00479008	yes
QPCT	2:37571716-37600465	-1.93895	0.00157017	0.0154089	yes
-	9:115096218-115097757	-1.94124	0.000548884	0.00646793	yes
-	17:60553702-60555519	-1.95998	0.000459725	0.00559442	yes
-	8:53680626-53695671	-1.98175	0.00162052	0.0157913	yes
-	3:160340575-160342698	-1.98245	0.000501771	0.00601022	yes
-	22:42770051-42771102	-2.02393	0.000123153	0.00185519	yes
-	1:93520399-93522579	-2.02636	1.79926e-10	1.30746e-08	yes
-	11:6696821-6699895	-2.0319	6.41465e-05	0.00104635	yes
-	1:94317575-94319855	-2.04049	0.00690331	0.0490888	yes
LTF	3:46475832-46526724	-2.06034	0	0	yes
SLC25A48	5:135170326-135227452	-2.07578	6.64864e-06	0.000145983	yes
-	1:160501242-160502784	-2.09052	0.00582824	0.0429657	yes
-	8:129998001-130031668	-2.09281	0.000898954	0.00972911	yes
-	11:95039946-95043159	-2.09851	0.000813986	0.00898151	yes
-	1:69041499-69050173	-2.10276	3.07784e-10	2.11567e-08	yes
OLFM4	13:53602829-53626196	-2.11715	2.0961e-13	2.51862e-11	yes
VRK2	2:58134785-58468588	-2.1202	1.36701e-10	1.03784e-08	yes
-	1:249124073-249126611	-2.13164	6.25965e-05	0.00102712	yes
-	3:196765047-196766698	-2.13473	0.0047074	0.0367818	yes
WDR96	10:105889296-105992120	-2.13965	0.00436282	0.0347115	yes
[truncated: 16 more rows]
