# Supplementary material for: Characterizing the Genetic Basis for Nicotine Induced Cancer Development: A Transcriptome Sequencing Study
Source: PLoS One. 2013 Jun 18;8(6):e67252. doi: 10.1371/journal.pone.0067252 (PMC3688980; doi:10.1371/journal.pone.0067252)
Supplement: Table S2 — Transcripts which showed evidence of alternative splicing. (XLS) [file pone.0067252.s007.xls]

## Sheet: Sheet1
Gene	Locus	Sqrt(JS)	q_value
ARAP1	11:72396112-72505213	0.832555	0.000931587
ATG4C	1:62920398-63339980	0.832555	0.000931587
ATXN2L	16:28833431-28848558	0.832555	0.000931587
CCDC91	12:28286181-28733149	0.832555	0.000931587
CGGBP1	3:88101093-88217879	0.832555	0.000931587
EFNA3	1:155036202-155060014	0.832555	0.000931587
GNAI2	3:50263723-50296792	0.832555	0.000931587
GULP1	2:189154435-189460653	0.832555	0.000931587
IDI2-AS1	10:1034330-1178237	0.832555	0.000931587
MDH1	2:63348517-64054977	0.832555	0.000931587
NADKD1	5:36191751-36302379	0.832555	0.000931587
NIPAL1	4:47849256-48042188	0.832555	0.000931587
RAB1A	2:65283499-65357422	0.832555	0.000931587
RASSF8	12:26088948-26232825	0.832555	0.000931587
RPS11P5	12:133195365-133532892	0.832555	0.000931587
SH3D19	4:152041394-152246703	0.832555	0.000931587
WWC3	X:9983601-10112518	0.83012	0.000931587
ZNF335	20:44561706-44602714	0.824779	0.0231142
SNX7	1:99115029-99226056	0.740214	0.000931587
DIXDC1	11:111797867-112095422	0.727906	0.0201106
SH3D21	1:36771865-36794818	0.721279	0.000931587
ORC4	2:148689956-149275805	0.717096	0.0349168
PLEKHA7	11:16798872-17074583	0.706907	0.000931587
CLEC4A	12:8276227-8371507	0.687724	0.000931587
NAV2	11:19372270-20143144	0.679113	0.000931587
LTBP2	14:74942894-75083350	0.62542	0.0353974
HIF1A	14:62147191-62263146	0.624009	0.0179091
NOL8	9:95059639-95436825	0.622528	0.000931587
CROCCP2	1:16944683-16993814	0.613824	0.0064559
C11orf54	11:93394804-93547861	0.608575	0.000931587
DSTYK	1:205111631-205180820	0.602127	0.00712257
MYO19	17:34842478-34900681	0.587059	0.000931587
TFCP2	12:51487445-51566926	0.577172	0.000931587
TOPBP1	3:133317018-133497850	0.569083	0.000931587
C5orf42	5:37068312-37249530	0.550817	0.00468271
ZNF181	19:35224194-35233851	0.547001	0.00260019
CCT6P1	7:65216045-65235751	0.542577	0.00969193
RPF2	6:111302963-111349463	0.524585	0.000931587
APOO	X:23851469-23957624	0.520255	0.000931587
JARID2	6:15245733-15522266	0.515233	0.00468271
PACRGL	4:20697904-21950422	0.503968	0.000931587
NAGA	22:42394728-42466846	0.496073	0.0383874
TYMP	22:50946595-50978613	0.484505	0.0134017
SIPA1L3	19:38397860-38699012	0.484485	0.0180748
TIAL1	10:121331315-121360112	0.472155	0.0118366
HSD17B7	1:162760224-162783843	0.468254	0.0181559
CAPRIN2	12:30862485-30907885	0.464189	0.00494232
XIST	X:73040431-73072588	0.457087	0.000931587
MBNL1	3:151961616-152214602	0.445517	0.00690471
PTPRM	18:7567425-8406890	0.441608	0.000931587
ACTR3B	7:152456833-152562032	0.436781	0.0132751
FPGS	9:130547957-130576928	0.43445	0.000931587
SAMD8	10:76854189-76941882	0.432393	0.0336994
CDS1	4:85448276-85572491	0.427691	0.00231671
GPR50	X:150343663-150351320	0.425911	0.0461369
ARID3A	19:926036-975917	0.425135	0.0118835
TBC1D3G	17:34580901-34808103	0.421445	0.00231671
JAM2	21:27011276-27144771	0.419173	0.000931587
KIAA1609	16:84511680-84587639	0.418812	0.000931587
RPA3	7:7676148-8133902	0.415641	0.0201106
FAM63A	1:150954492-150980851	0.413395	0.0115374
ABCA10	17:67143354-67323323	0.408311	0.00987059
LARP1B	4:128838959-129144086	0.405868	0.0115374
C9orf72	9:27536933-27573864	0.404581	0.0455749
SLC9A8	20:48428542-48508780	0.403376	0.0383874
COL4A5	X:107682907-107940775	0.391884	0.00286293
NAPRT1	8:144648356-144685387	0.386926	0.0241547
CAST	5:95220801-96143850	0.383925	0.0131466
ZNF335	20:44561706-44602714	0.383716	0.000931587
MTHFD2L	4:74978850-75254478	0.383475	0.000931587
CSDA	12:10851682-10876251	0.383104	0.000931587
SECTM1	17:80272742-80291997	0.379128	0.000931587
CDK11A	1:1567473-1678641	0.378565	0.0103104
LRRC37B	17:30334737-30380521	0.376983	0.036953
WDR89	14:64063756-64118227	0.36887	0.0130159
CYP2R1	11:14665268-14913798	0.367752	0.037218
SMARCD1	12:50478754-50494495	0.365194	0.00286293
SCO1	17:10575787-10614550	0.355336	0.00775151
ZNF271	18:32820567-32907404	0.352607	0.000931587
SIN3A	15:75648132-75954642	0.352218	0.0431056
DENND4B	1:153901798-153919176	0.348175	0.00969193
ID2	2:8806765-8824583	0.345129	0.0291494
SFSWAP	12:132195233-132284282	0.340024	0.000931587
HERC4	10:69681664-69835354	0.33571	0.00231671
PPIH	1:43123838-43142429	0.331721	0.0336994
RUNX1	21:36160097-37357047	0.329611	0.000931587
PEX14	1:10516390-10690821	0.326158	0.000931587
LRRK1	15:101389765-101626271	0.324023	0.0179091
CIZ1	9:130928335-131017527	0.315506	0.000931587
LDLRAD3	11:35965530-36253778	0.314908	0.00260019
ZNF510	9:99516840-99775862	0.314286	0.0118366
PSPH	7:56069138-56131684	0.312517	0.000931587
RHOT1	17:30468244-30552746	0.307889	0.00438489
ZC3H7A	16:11844441-11891099	0.306807	0.000931587
SMN2	5:69345349-69374349	0.302816	0.00877607
TMEM242	6:157703237-157745176	0.302125	0.00568934
C2orf68	2:85822847-85876406	0.301801	0.000931587
SNAPC4	9:139270028-139294636	0.295809	0.00231671
FAM136A	2:70523106-70529385	0.293914	0.00519651
ACSL1	4:185664159-185747972	0.292425	0.000931587
CCDC99	5:169010637-169031788	0.29036	0.00438489
HGS	17:79650979-79688259	0.288083	0.0158012
PRKRIP1	7:102004305-102067128	0.285919	0.00206655
AMIGO2	12:47469489-47630443	0.278594	0.000931587
IP6K2	3:48725435-48777786	0.277553	0.0324138
WWC3	X:9983601-10112518	0.272344	0.0383874
ASCC3	6:100956069-101329248	0.270256	0.00131396
PAPD7	5:6714717-6757161	0.269624	0.000931587
MYO6	6:76458908-76629254	0.269314	0.00131396
PRPS1	X:106871680-106894256	0.268891	0.0259743
PRKD3	2:37394962-37551987	0.267557	0.0111667
ITGAE	17:3608853-3704537	0.265931	0.0158012
MYO5A	15:52599479-52821247	0.265237	0.00286293
BCAR3	1:94027335-94315109	0.263432	0.0211936
RBM15	1:110828996-110933704	0.254366	0.0370863
POU5F1	6:31126159-31154591	0.252733	0.0201106
GOLGA4	3:37283302-37408243	0.252623	0.0139847
FKBP15	9:115913221-116055466	0.251891	0.0104804
PAX9	14:37116287-37643016	0.248744	0.0383874
RBBP5	1:205052248-205091405	0.247713	0.00733625
LARP4B	10:855483-977583	0.247114	0.0424245
DNAJB2	2:220143988-220151622	0.246961	0.00568934
POLB	8:42195542-42229326	0.246727	0.00468271
KTN1	14:55965995-56168244	0.246289	0.00167686
PHF8	X:53963094-54075391	0.24505	0.00353554
MBTD1	17:49254779-49375298	0.244992	0.0383874
GPBP1	5:56469691-56560505	0.242952	0.00167686
WSB1	17:25621105-25640657	0.241972	0.00456478
AMBRA1	11:46417963-46615675	0.241167	0.0383874
RPS24	10:79792954-79816638	0.237246	0.000931587
NAV2	11:19372270-20143144	0.235635	0.0179091
MPHOSPH8	13:20176260-20357142	0.23035	0.0383874
GNL3	3:52529353-52742182	0.229938	0.000931587
RHPN2	19:33469498-33555824	0.227775	0.0455749
MRPL55	1:228288426-228297034	0.224752	0.000931587
POLR2B	4:57829535-58071676	0.222303	0.00456478
CPSF1	8:145596789-145634827	0.21697	0.0064559
TXLNG	X:16804549-16888537	0.216356	0.00131396
DMKN	19:35988121-36004621	0.213611	0.000931587
POGLUT1	3:119145491-119213555	0.210208	0.0486381
SBF1	22:50769180-50913464	0.209337	0.0179091
GGCT	7:30536234-30544460	0.208078	0.0126446
LIMA1	12:50569570-50677353	0.207651	0.0228689
SMC3	10:112327413-112364395	0.202423	0.00167686
TPD52L2	20:62486440-62522898	0.19757	0.000931587
RND3	2:151324708-151395525	0.188034	0.0419937
SNHG1	11:62619459-62623386	0.186117	0.000931587
ADCY6	12:49159974-49182820	0.185847	0.0303103
PARP4	13:24982294-25171814	0.185484	0.0383874
TRIM28	19:59055835-59062082	0.173285	0.000931587
CBL	11:119076751-119178851	0.172735	0.0180748
MYOF	10:95066185-95242074	0.171598	0.00231671
NFKBIE	6:44225375-44233500	0.171033	0.0126446
NFE2L1	17:46125685-46139286	0.162498	0.0038428
PQBP1	X:48750729-48769235	0.157407	0.000931587
AHCYL1	1:110527307-110566357	0.156899	0.0419937
EPT1	2:26531040-26618759	0.153062	0.0271786
SMARCA5	4:144433938-144478639	0.152408	0.0179091
GM2A	5:150560422-150652294	0.149183	0.00690471
NEAT1	11:65189789-65213011	0.132697	0.00456478
LINC00256B	9:115864338-115873780	0.127908	0.0338309
ZNF770	15:35144006-35280982	0.1278	0.00754586
GPATCH2	1:217600333-217804424	0.126188	0.0353974
SLC35B2	6:44221832-44225291	0.121914	0.000931587
RHOC	1:113243727-113258099	0.120884	0.000931587
TMEM222	1:27648558-27662891	0.117366	0.0179091
MEF2D	1:156433518-156470687	0.114593	0.0113261
ELOVL6	4:110967001-111120355	0.109974	0.00468271
HNRNPUL2	11:62457746-62507756	0.109191	0.0338309
VEGFA	6:43737912-43754224	0.105217	0.000931587
ATP5E	20:57594308-57607437	0.0881082	0.00438489
AKR1C2	10:5029966-5060207	0.0678107	0.029928
H2AFJ	12:14926076-14930936	0.059365	0.0428504
